# Supplementary material for: New Phosphonite Ligands with High Steric Demand and Low Basicity: Synthesis, Structural Properties and Cyclometalated Complexes of Pt(II)
Source: MDPI journal article supplement (doi:10.3390/inorganics10080109), 2022-07-29
Supplement: s1 [file s1]

**Supporting Information**  
**for**  
**New Phosphonite Ligands with High Steric Demand and Low Basicity: Synthesis, Structural Properties, and Cyclometalated Complexes of Pt(II).**

María M. Alcaide <sup>1</sup>, Matteo Pugliesi <sup>2</sup>, Eleuterio Álvarez <sup>1</sup>, Joaquín López-Serrano <sup>1,\*</sup> and Riccardo Peloso <sup>1,\*</sup>

<sup>1</sup> Instituto de Investigaciones Químicas (IIQ), Departamento de Química Inorgánica and Centro de Innovación en Química Avanzada (ORFEO-CINQA), Consejo Superior de Investigaciones Científicas (CSIC) and Universidad de Sevilla, 41092 Sevilla, Spain.

<sup>2</sup> Dipartimento di Chimica e Chimica Industriale, Università di Pisa, Via G. Moruzzi 13, I-56124 Pisa, Italy.

\* Correspondence: rpeloso@us.es

|                                                                            |      |
|----------------------------------------------------------------------------|------|
| Cristal data and structure refinement for complex <b>1·CO</b>              | p. 2 |
| Cristal data and structure refinement for complex <b>2</b>                 | p. 3 |
| Cristal data and structure refinement for complex <b>3·SMe<sub>2</sub></b> | p. 4 |
| Additional comments on conformational analysis                             | p. 5 |
| NMR spectra                                                                | p. 6 |

**Table S1.** Crystal data and structure refinement for compound **1·CO**

|                                   |                                                                   |                    |
|-----------------------------------|-------------------------------------------------------------------|--------------------|
| Empirical formula                 | C <sub>36</sub> H <sub>31</sub> N <sub>2</sub> O <sub>7</sub> PPt |                    |
| Formula weight                    | 829.69                                                            |                    |
| Temperature                       | 193(2) K                                                          |                    |
| Wavelength                        | 0.71073 Å                                                         |                    |
| Crystal system                    | Monoclinic                                                        |                    |
| Space group                       | C2/c                                                              |                    |
| Unit cell dimensions              | a = 19.2942(3) Å                                                  | α = 90°.           |
|                                   | b = 13.1677(3) Å                                                  | β = 109.9290(10)°. |
|                                   | c = 27.7585(6) Å                                                  | γ = 90°.           |
| Volume                            | 6630.0(2) Å <sup>3</sup>                                          |                    |
| Z                                 | 8                                                                 |                    |
| Density (calculated)              | 1.662 Mg/m <sup>3</sup>                                           |                    |
| Absorption coefficient            | 4.333 mm <sup>-1</sup>                                            |                    |
| F(000)                            | 3280                                                              |                    |
| Crystal size                      | 0.400 x 0.300 x 0.200 mm <sup>3</sup>                             |                    |
| Theta range for data collection   | 1.911 to 30.517°.                                                 |                    |
| Index ranges                      | -26 ≤ h ≤ 27, -18 ≤ k ≤ 17, -39 ≤ l ≤ 39                          |                    |
| Reflections collected             | 43363                                                             |                    |
| Independent reflections           | 10110 [R(int) = 0.0286]                                           |                    |
| Completeness to theta = 25.242°   | 99.9 %                                                            |                    |
| Absorption correction             | Semi-empirical from equivalents                                   |                    |
| Max. and min. transmission        | 0.7461 and 0.4425                                                 |                    |
| Refinement method                 | Full-matrix least-squares on F <sup>2</sup>                       |                    |
| Data / restraints / parameters    | 10110 / 42 / 429                                                  |                    |
| Goodness-of-fit on F <sup>2</sup> | 0.996                                                             |                    |
| Final R indices [I > 2σ(I)]       | R1 = 0.0210, wR2 = 0.0490                                         |                    |
| R indices (all data)              | R1 = 0.0257, wR2 = 0.0513                                         |                    |
| Extinction coefficient            | n/a                                                               |                    |
| Largest diff. peak and hole       | 1.124 and -0.865 e.Å <sup>-3</sup>                                |                    |

**Table S2.** Crystal data and structure refinement for compound **2**.

|                                        |                                                                                           |                              |
|----------------------------------------|-------------------------------------------------------------------------------------------|------------------------------|
| Empirical formula                      | $C_{70}H_{60}Cl_6N_4O_{12}P_2Pt_2$<br>[ $C_{68}H_{56}Cl_2N_4O_{12}P_2Pt_2, 2(CH_2Cl_2)$ ] |                              |
| Formula weight                         | 1814.04                                                                                   |                              |
| Temperature                            | 293(2) K                                                                                  |                              |
| Wavelength                             | 0.71073 Å                                                                                 |                              |
| Crystal system                         | Monoclinic                                                                                |                              |
| Space group                            | I2                                                                                        |                              |
| Unit cell dimensions                   | $a = 16.1829(14)$ Å                                                                       | $\alpha = 90^\circ$ .        |
|                                        | $b = 12.6047(10)$ Å                                                                       | $\beta = 102.259(3)^\circ$ . |
|                                        | $c = 17.6419(15)$ Å                                                                       | $\gamma = 90^\circ$ .        |
| Volume                                 | $3516.5(5)$ Å <sup>3</sup>                                                                |                              |
| Z                                      | 2                                                                                         |                              |
| Density (calculated)                   | 1.713 Mg/m <sup>3</sup>                                                                   |                              |
| Absorption coefficient                 | $4.311$ mm <sup>-1</sup>                                                                  |                              |
| F(000)                                 | 1784                                                                                      |                              |
| Crystal size                           | $0.50 \times 0.40 \times 0.20$ mm <sup>3</sup>                                            |                              |
| Theta range for data collection        | $2.066$ to $30.562^\circ$ .                                                               |                              |
| Index ranges                           | $-22 \leq h \leq 23$ , $-17 \leq k \leq 18$ , $-25 \leq l \leq 25$                        |                              |
| Reflections collected                  | 37774                                                                                     |                              |
| Independent reflections                | 10533 [R(int) = 0.0335]                                                                   |                              |
| Completeness to theta = $25.242^\circ$ | 99.9 %                                                                                    |                              |
| Absorption correction                  | Semi-empirical from equivalents                                                           |                              |
| Max. and min. transmission             | 0.7461 and 0.3665                                                                         |                              |
| Refinement method                      | Full-matrix least-squares on F <sup>2</sup>                                               |                              |
| Data / restraints / parameters         | 10533 / 31 / 438                                                                          |                              |
| Goodness-of-fit on F <sup>2</sup>      | 0.998                                                                                     |                              |
| Final R indices [I > 2sigma(I)]        | R1 = 0.0241, wR2 = 0.0642                                                                 |                              |
| R indices (all data)                   | R1 = 0.0248, wR2 = 0.0651                                                                 |                              |
| Absolute structure parameter           | 0.017(7)                                                                                  |                              |
| Extinction coefficient                 | n/a                                                                                       |                              |
| Largest diff. peak and hole            | 0.883 and $-2.360$ e.Å <sup>-3</sup>                                                      |                              |

**Table S3.** Crystal data and structure refinement for compound **3·SMe2**.

|                                   |                                                                    |                   |
|-----------------------------------|--------------------------------------------------------------------|-------------------|
| Empirical formula                 | C <sub>40</sub> H <sub>41</sub> N <sub>2</sub> O <sub>6</sub> PPtS |                   |
| Formula weight                    | 903.87                                                             |                   |
| Temperature                       | 298(2) K                                                           |                   |
| Wavelength                        | 0.71073 Å                                                          |                   |
| Crystal system                    | Monoclinic                                                         |                   |
| Space group                       | P2 <sub>1</sub> /c                                                 |                   |
| Unit cell dimensions              | a = 16.041(6) Å                                                    | α = 90°.          |
|                                   | b = 11.559(5) Å                                                    | β = 108.731(14)°. |
|                                   | c = 21.563(8) Å                                                    | γ = 90°.          |
| Volume                            | 3787(3) Å <sup>3</sup>                                             |                   |
| Z                                 | 4                                                                  |                   |
| Density (calculated)              | 1.585 Mg/m <sup>3</sup>                                            |                   |
| Absorption coefficient            | 3.852 mm <sup>-1</sup>                                             |                   |
| F(000)                            | 1808                                                               |                   |
| Crystal size                      | 0.400 × 0.300 × 0.200 mm <sup>3</sup>                              |                   |
| Theta range for data collection   | 1.995 to 30.559°.                                                  |                   |
| Index ranges                      | -22 ≤ h ≤ 22, -16 ≤ k ≤ 15, -30 ≤ l ≤ 30                           |                   |
| Reflections collected             | 129299                                                             |                   |
| Independent reflections           | 11541 [R(int) = 0.0405]                                            |                   |
| Completeness to theta = 25.242°   | 99.8 %                                                             |                   |
| Absorption correction             | Semi-empirical from equivalents                                    |                   |
| Max. and min. transmission        | 0.7461 and 0.4801                                                  |                   |
| Refinement method                 | Full-matrix least-squares on F <sup>2</sup>                        |                   |
| Data / restraints / parameters    | 11541 / 276 / 468                                                  |                   |
| Goodness-of-fit on F <sup>2</sup> | 1.042                                                              |                   |
| Final R indices [I > 2σ(I)]       | R1 = 0.0258, wR2 = 0.0673                                          |                   |
| R indices (all data)              | R1 = 0.0334, wR2 = 0.0728                                          |                   |
| Extinction coefficient            | n/a                                                                |                   |
| Largest diff. peak and hole       | 1.595 and -1.922                                                   |                   |

## Additional comments on conformational analyses

We have performed relaxed potential energy scans of the rotation around the P—C bond of **PAr<sup>Xyl2</sup>(OPh<sup>NO2</sup>)<sub>2</sub>** and **PAr<sup>Xyl2</sup>(OPh<sup>NO2,Me</sup>)<sub>2</sub>** at the same level of theory as the geometry optimizations. Also, we have performed full conformational analysis using semiempirical quantum mechanical methods (GFNn-xTB) and the CREST code [1,2]. Analysis of these results confirm the calculated geometries discussed in the main text as the most stable type of conformer for each ligand, even though in the case of **PAr<sup>Xyl2</sup>(OPh<sup>NO2</sup>)<sub>2</sub>** conformations B and C are almost degenerate. In addition, the relaxed scan calculations suggest that P—C rotation is facile for both ligands (almost barrierless for **PAr<sup>Xyl2</sup>(OPh<sup>NO2</sup>)<sub>2</sub>**).

---

<sup>1</sup> Pracht, P.; Bohle, F.; Grimme, S. Automated exploration of the low-energy chemical space with fast quantum chemical methods. *Phys. Chem. Chem. Phys.* **2020**, *22*, 7169-7192.

<sup>2</sup> Grimme, S. Exploration of Chemical Compound, Conformer, and Reaction Space with Meta-Dynamics Simulations Based on Tight-Binding Quantum Chemical Calculations. *J. Chem. Theory Comput.* **2019**, *15*, 2847-2862.

# NMR spectra

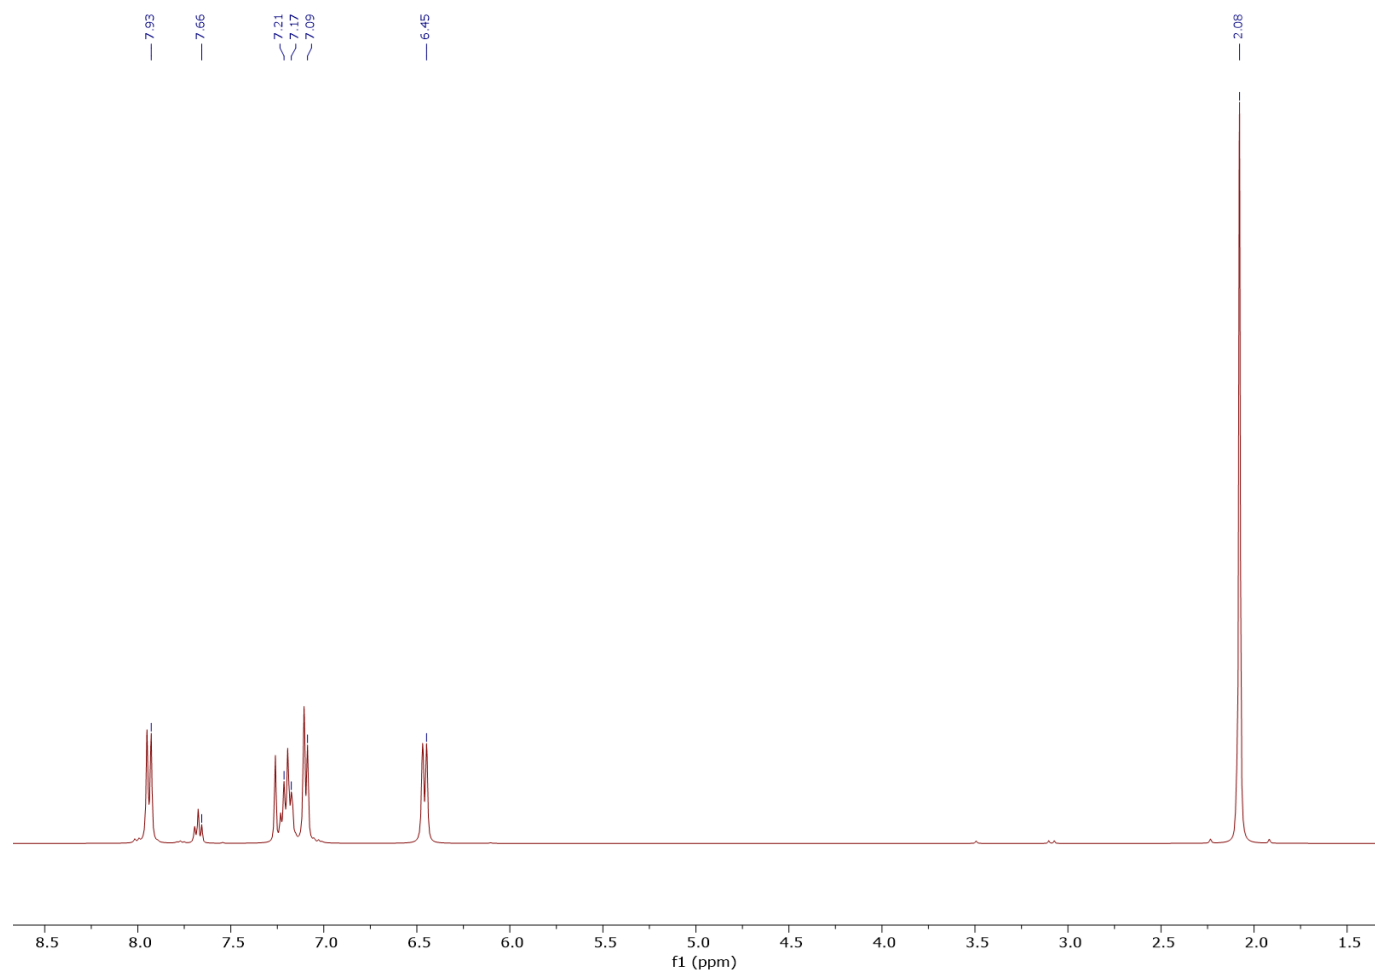

**Figura S1.**  $^1\text{H}$  NMR spectrum of  $\text{PAr}^{\text{Xyl}2}(\text{OPh}^{\text{NO}_2})_2$  in  $\text{CDCl}_3$ .

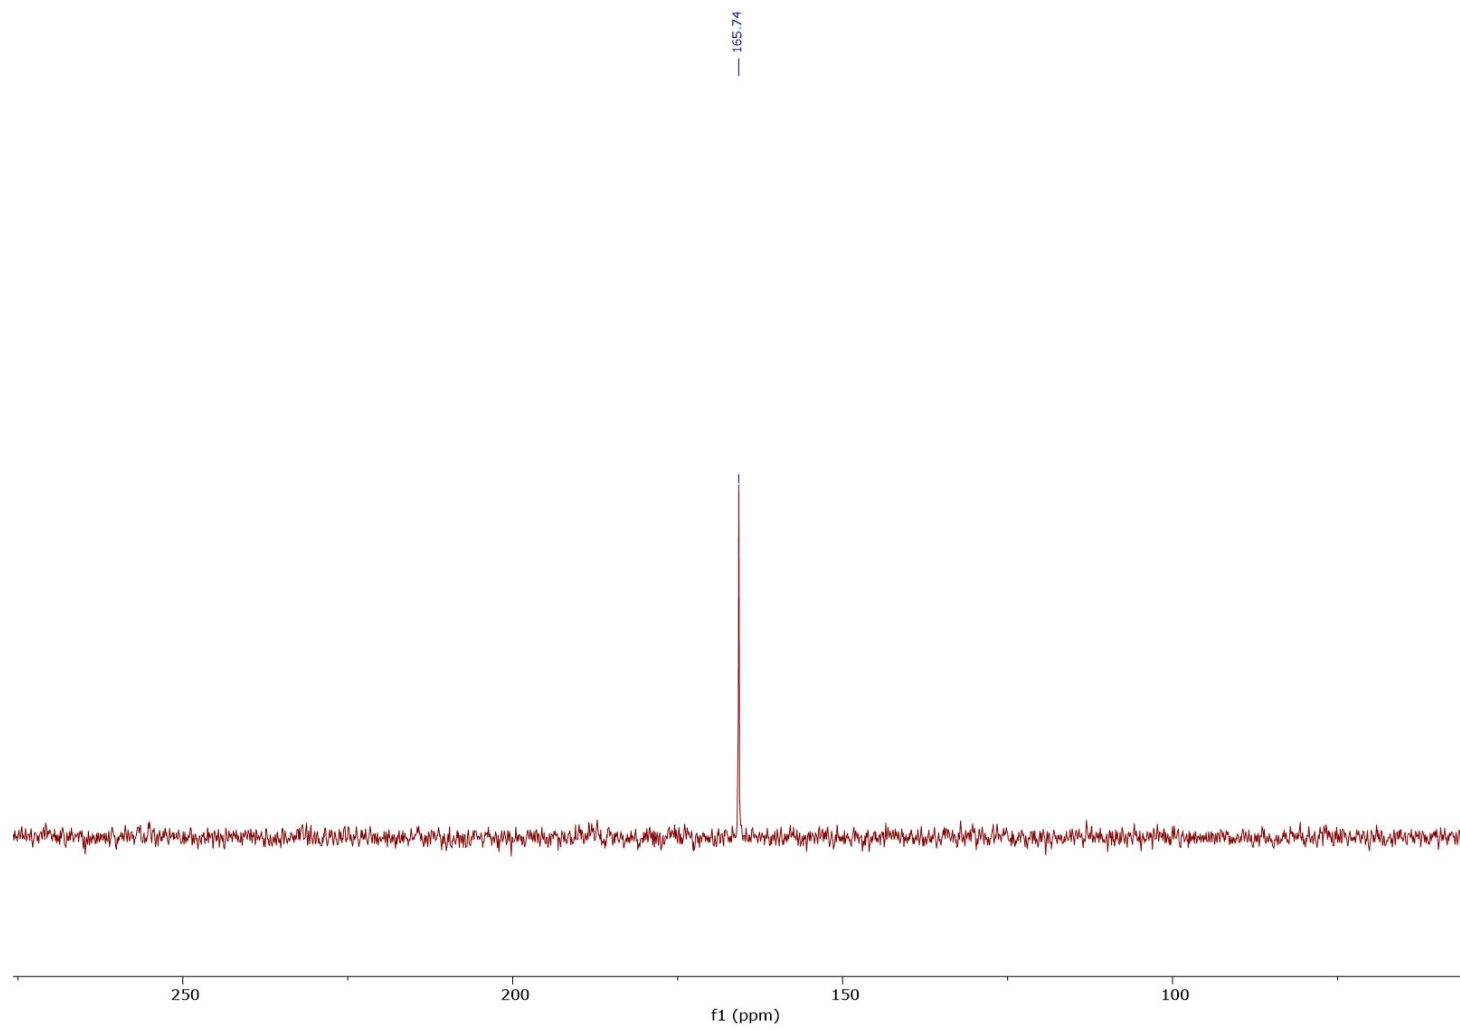

**Figura S2.**  $^{31}\text{P}\{^1\text{H}\}$  NMR spectrum of complex of  $\text{PAr}^{\text{Xyl}}\text{I}_2(\text{OPh}^{\text{NO}_2})_2$  in  $\text{CDCl}_3$ .

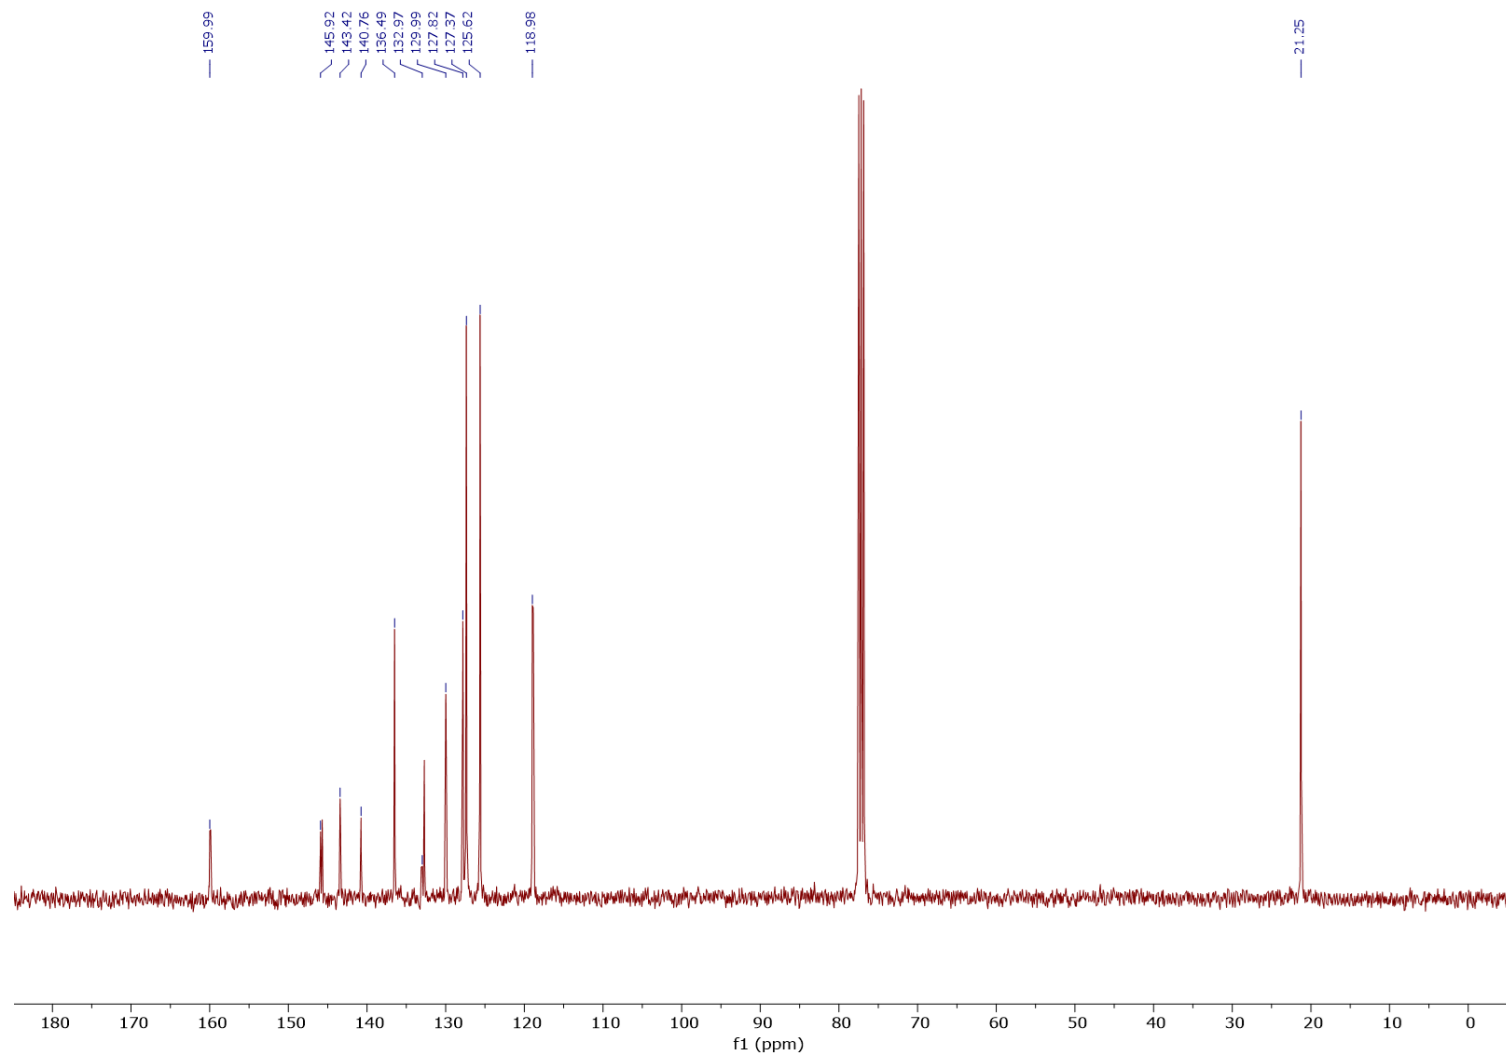

**Figure S3.**  $^{13}\text{C}\{^1\text{H}\}$  NMR spectrum of  $\text{PAr}^{\text{Xyl}2}(\text{OPhNO}_2)_2$  in  $\text{CDCl}_3$ .



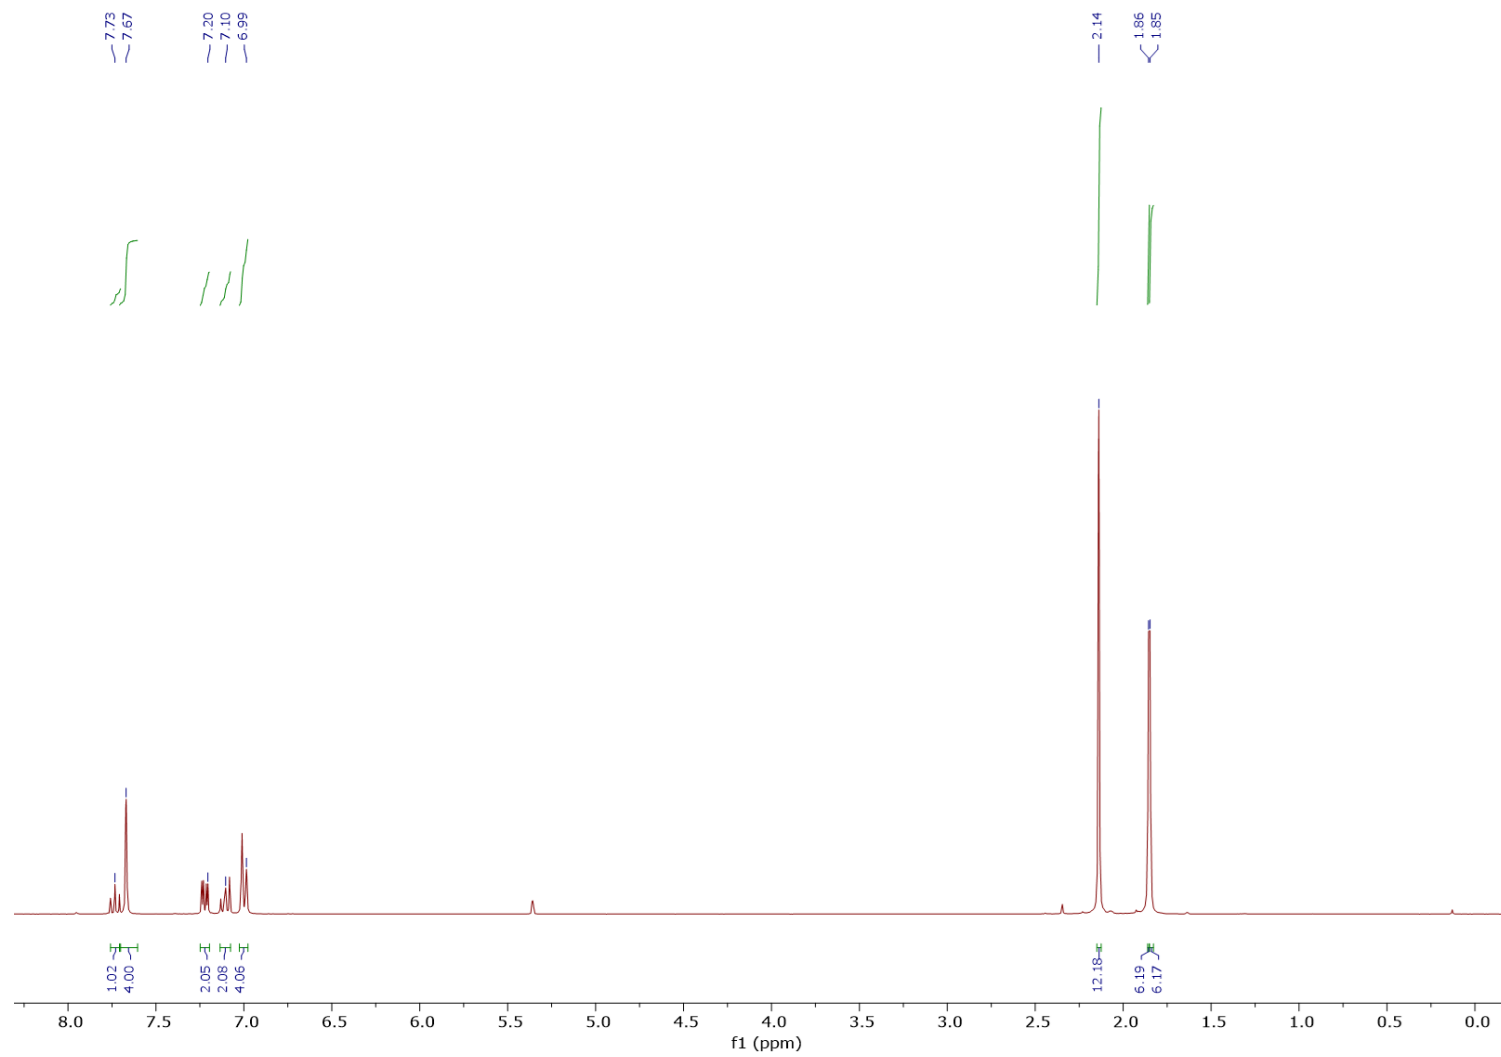

**Figura S4.**  $^1\text{H}$  NMR spectrum of complex of  $\text{PAR}^{\text{Xyl}2}(\text{OPh}^{\text{NO}_2\text{Me}})_2$  in  $\text{CD}_2\text{Cl}_2$ .

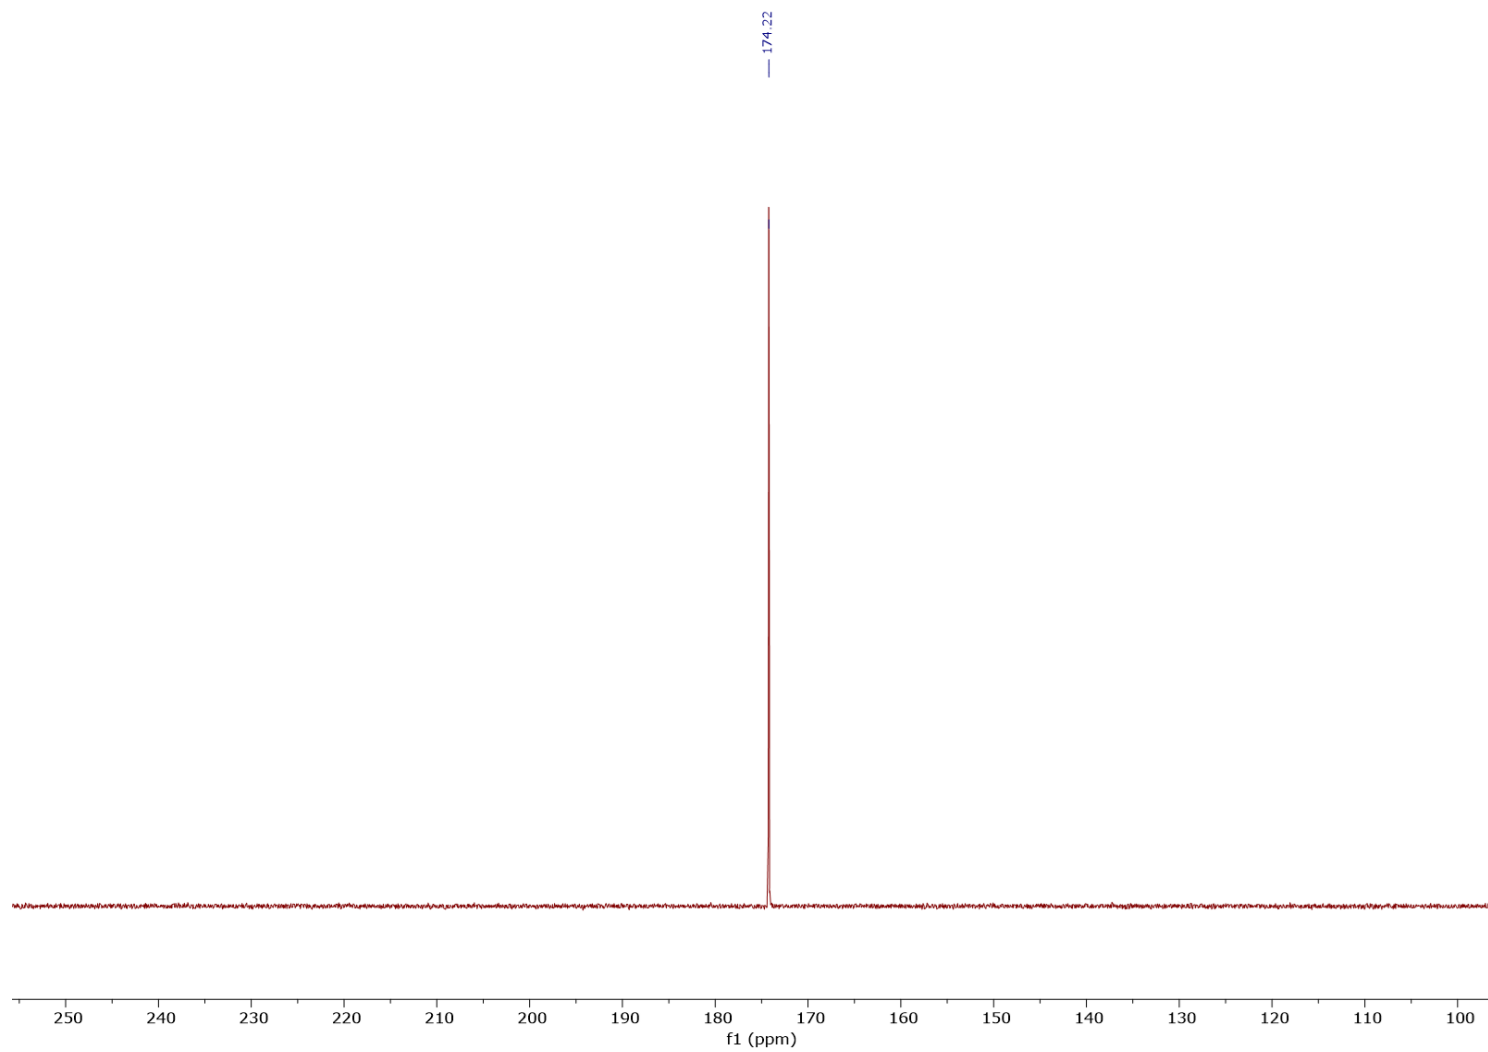

**Figura S5.**  $^{31}\text{P}\{^1\text{H}\}$  NMR spectrum of complex of  $\text{PAr}^{\text{Xyl2}}(\text{OPh}^{\text{NO}_2, \text{Me}})_2$  in  $\text{CD}_2\text{Cl}_2$ .

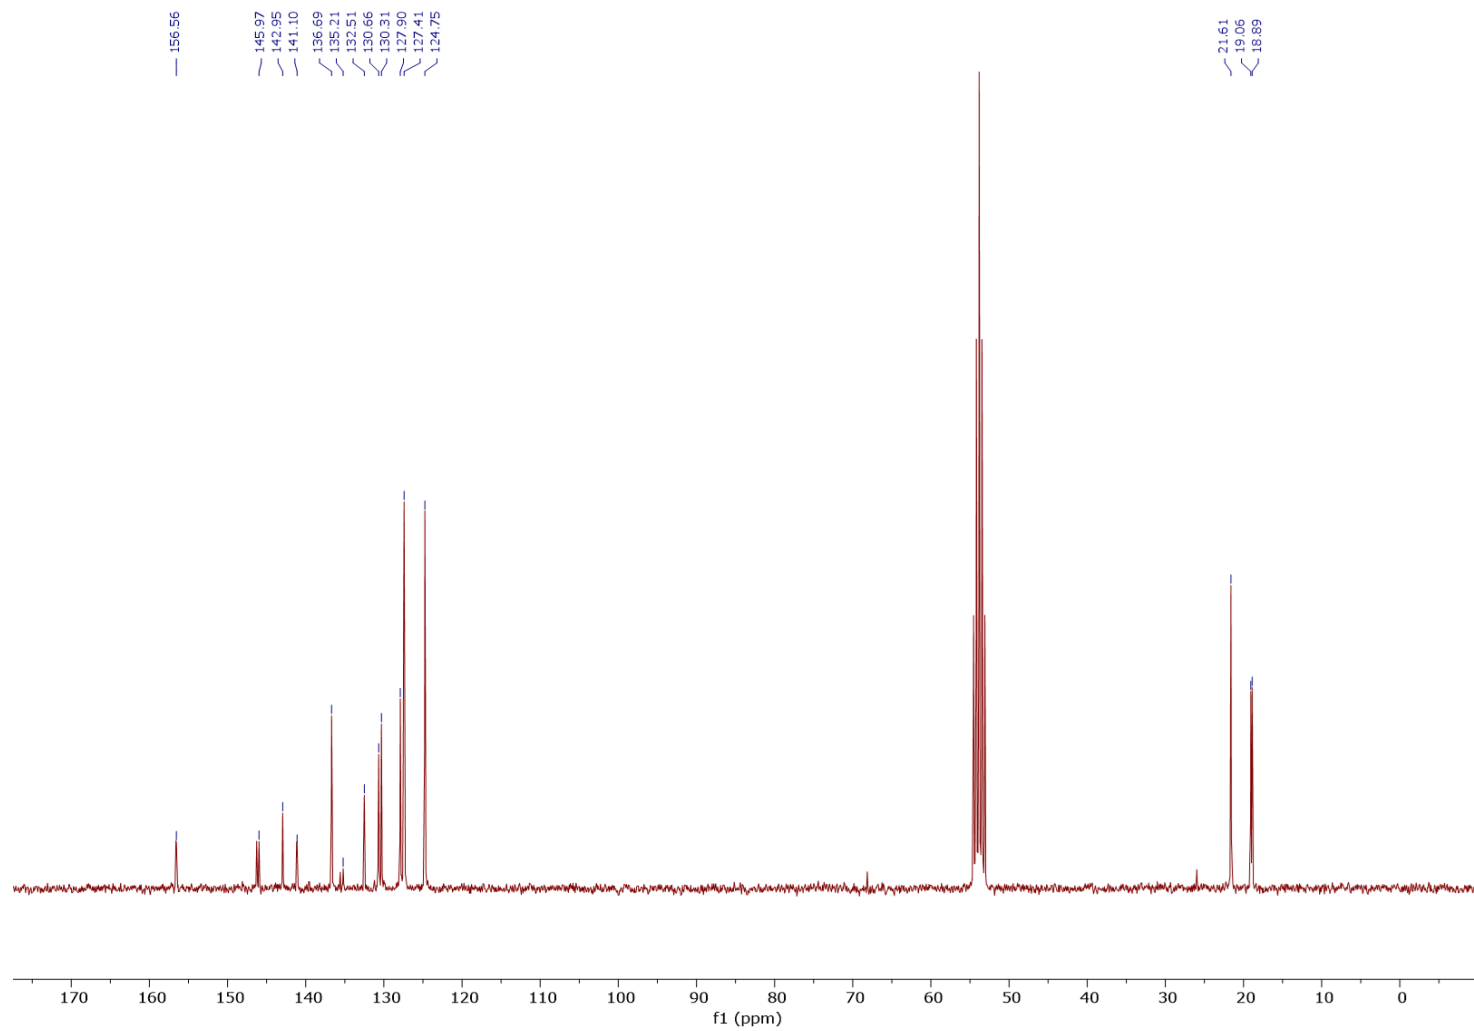

**Figure S6.**  $^{13}\text{C}\{^1\text{H}\}$  NMR spectrum of complex of  $\text{PAr}^{\text{Xyl}2}(\text{OPh}^{\text{NO}_2\text{Me}})_2$  in  $\text{CD}_2\text{Cl}_2$ .

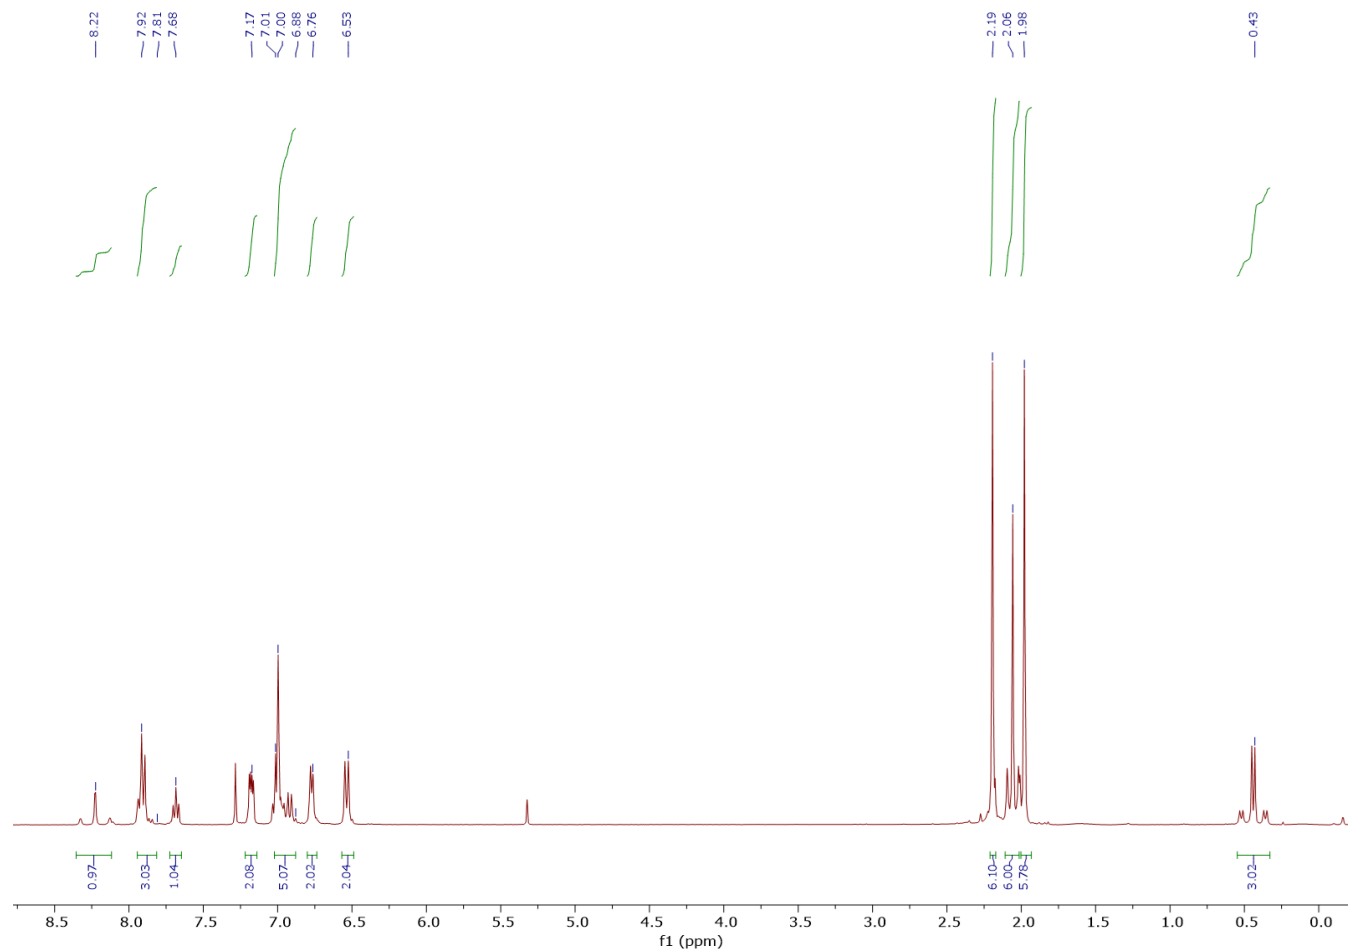

**Figure S7.** <sup>1</sup>H NMR spectrum of complex of **1**·SMe<sub>2</sub> in CD<sub>2</sub>Cl<sub>2</sub>.

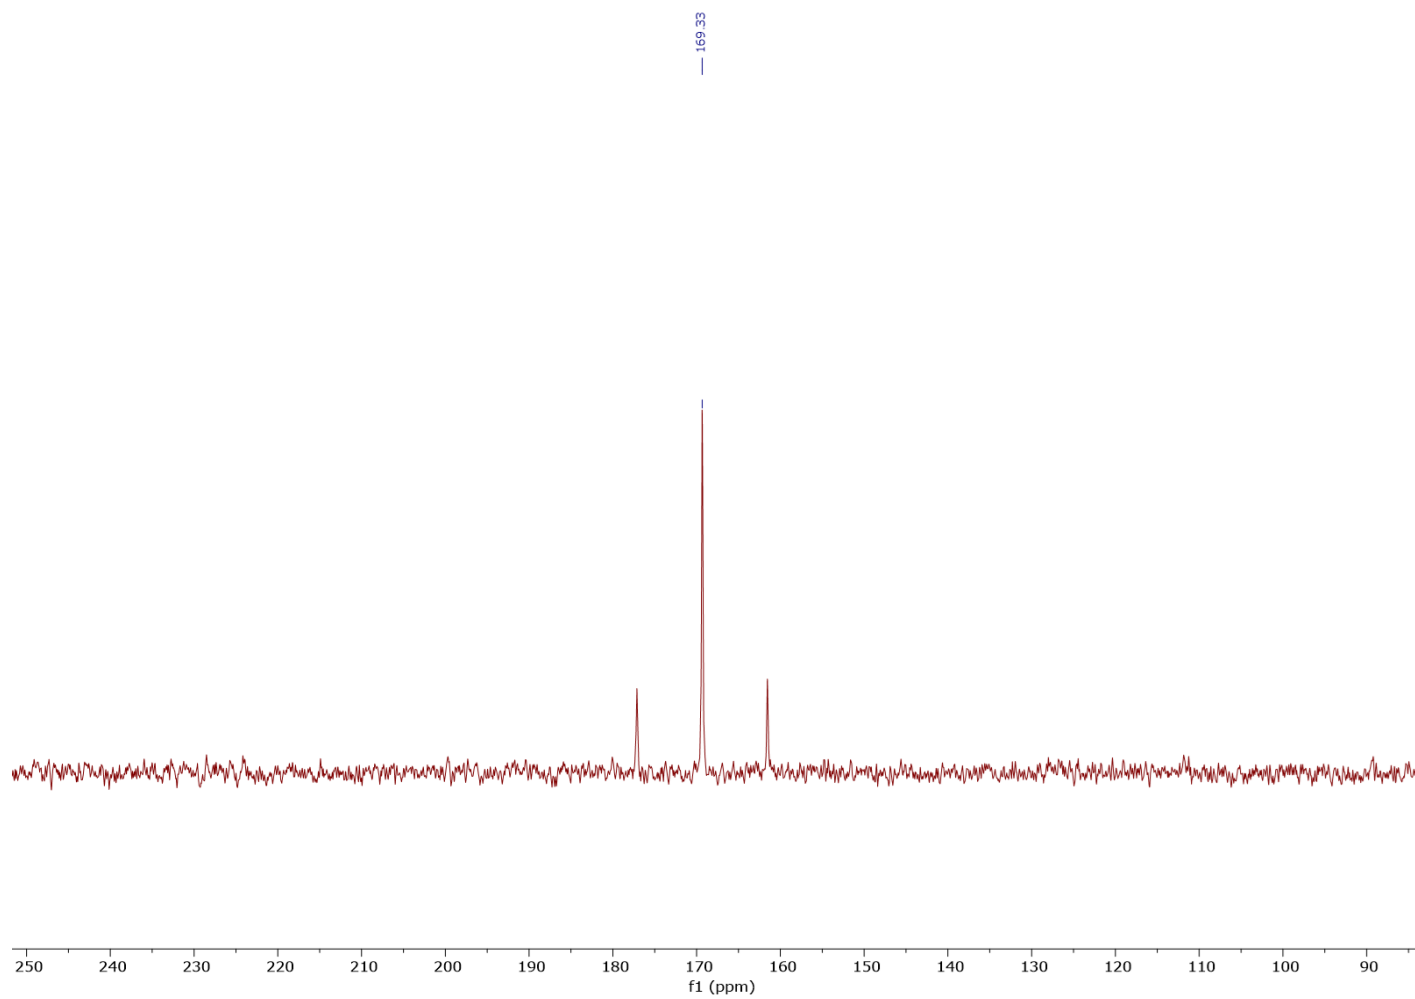

**Figura S8.**  $^{31}\text{P}\{^1\text{H}\}$  NMR spectrum of complex of **1**·**SMe**<sub>2</sub> in  $\text{CD}_2\text{Cl}_2$ .

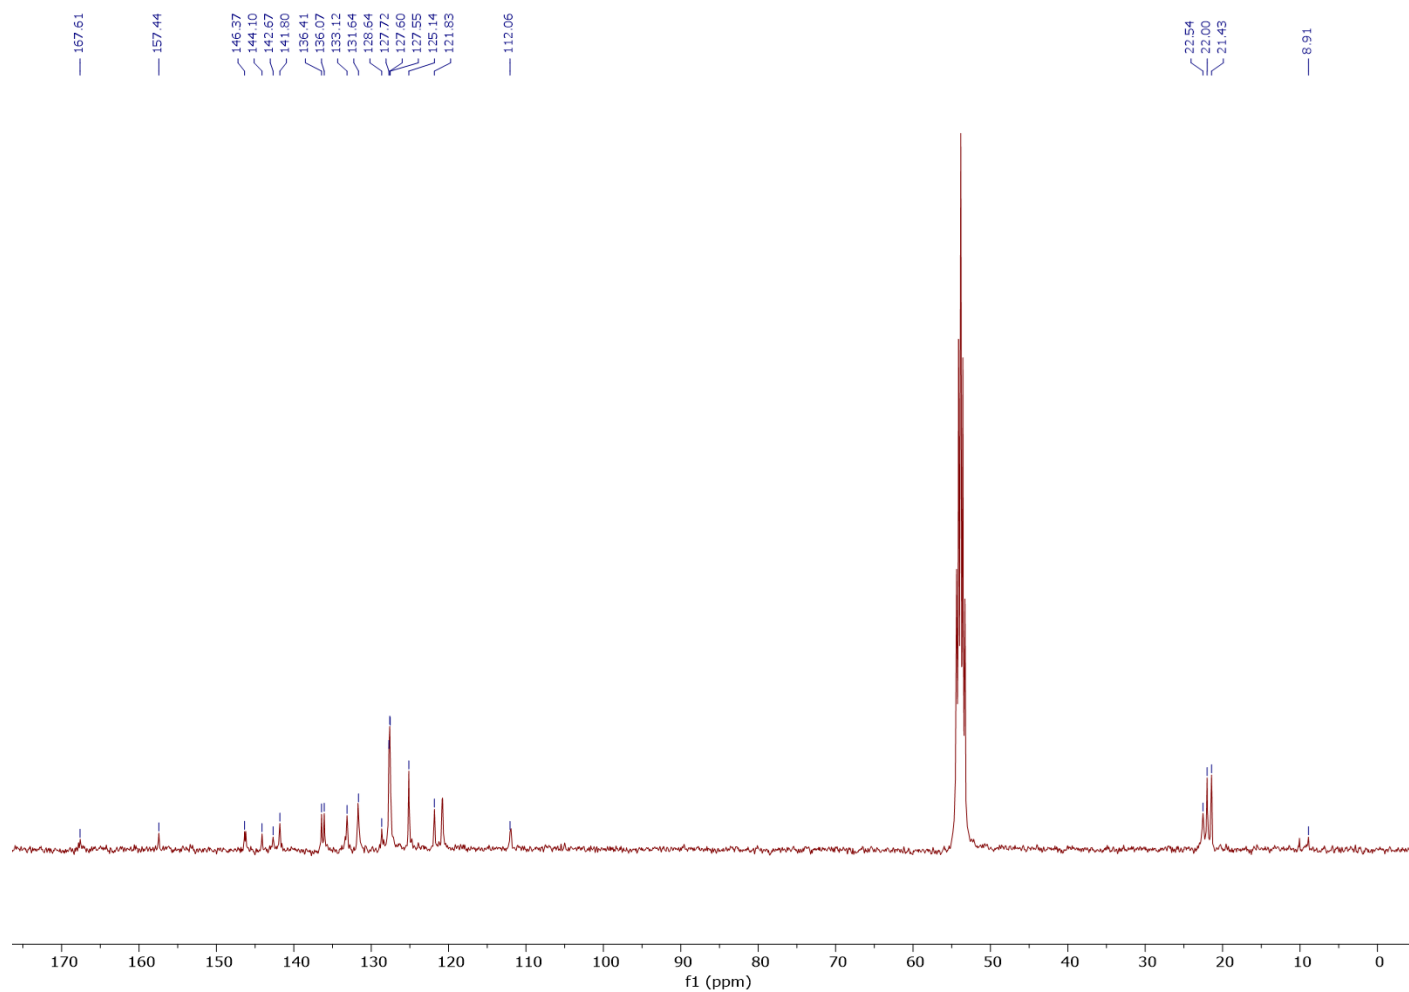

**Figura S9.**  $^{13}\text{C}\{^1\text{H}\}$  NMR spectrum of complex of **1**· $\text{SMe}_2$  in  $\text{CD}_2\text{Cl}_2$ .

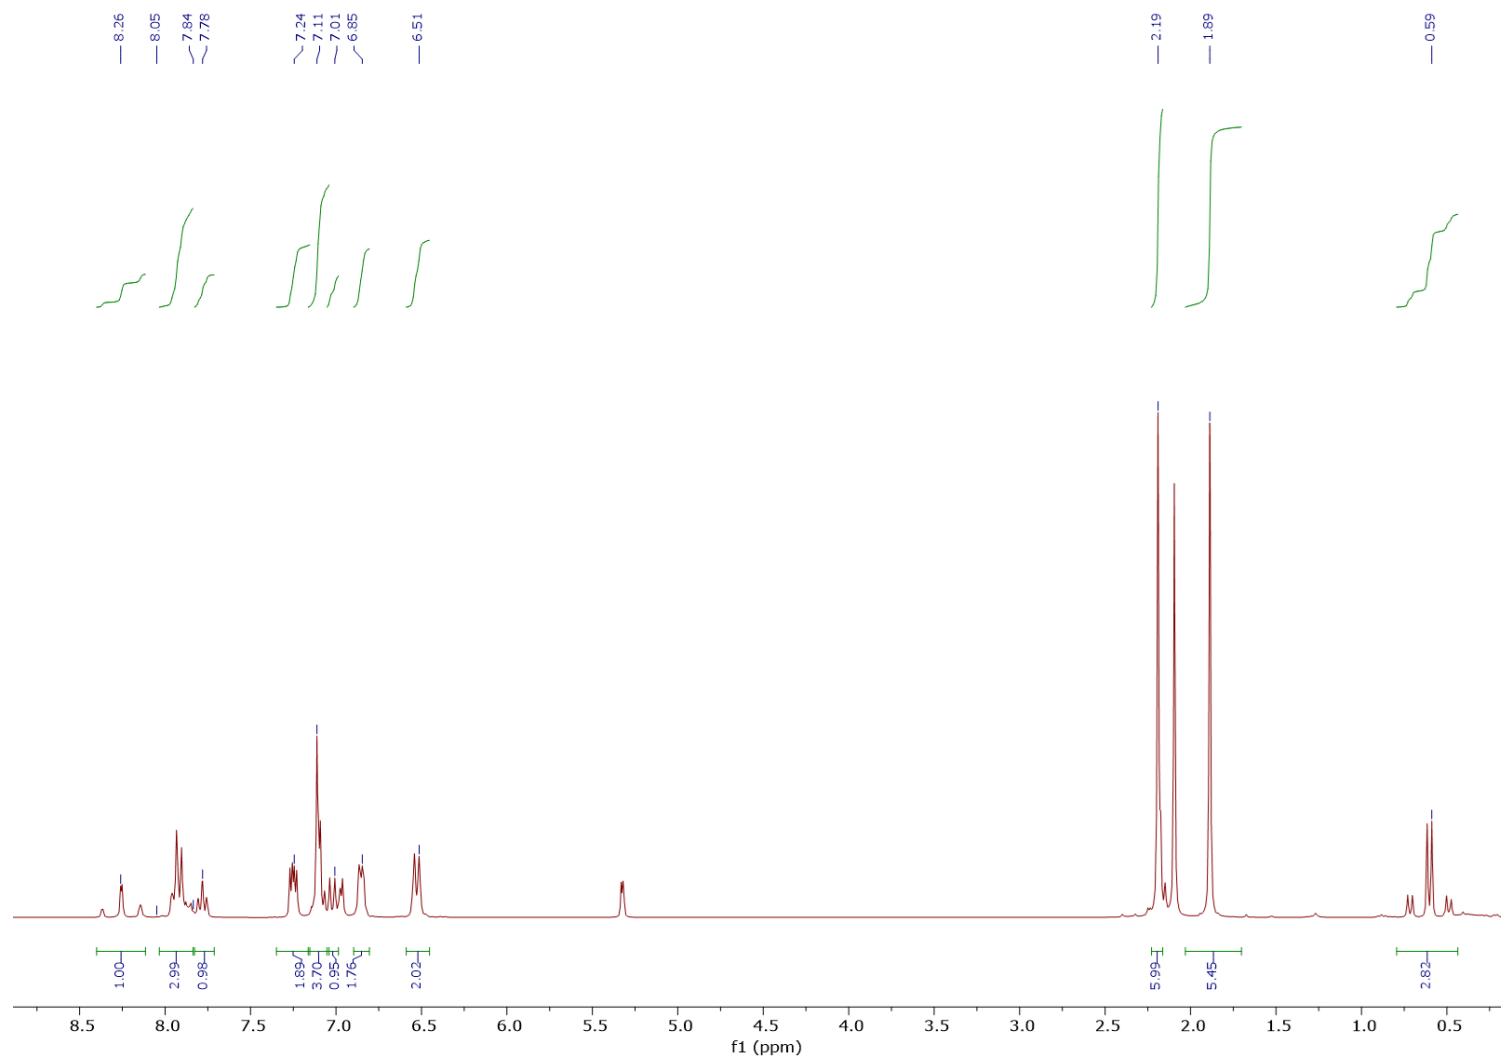

**Figure S10.** <sup>1</sup>H NMR spectrum of complex of **1**·CO in CD<sub>2</sub>Cl<sub>2</sub>.

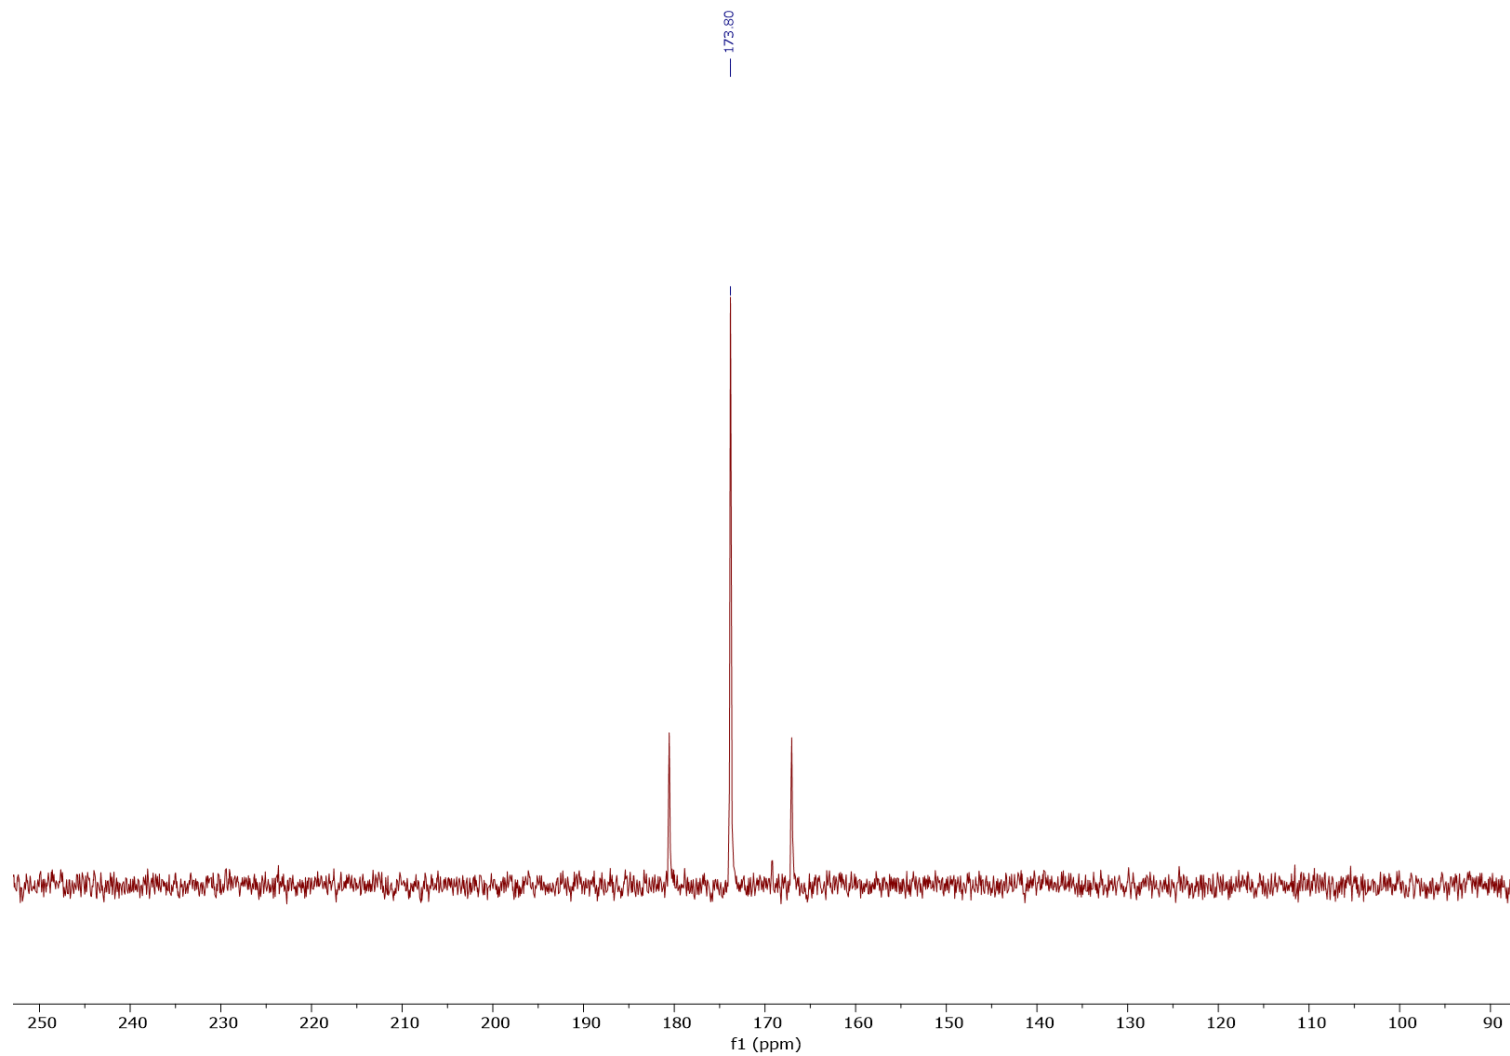

**Figura S11.**  $^{31}\text{P}\{^1\text{H}\}$  NMR spectrum of complex of **1**•CO in  $\text{CD}_2\text{Cl}_2$ .



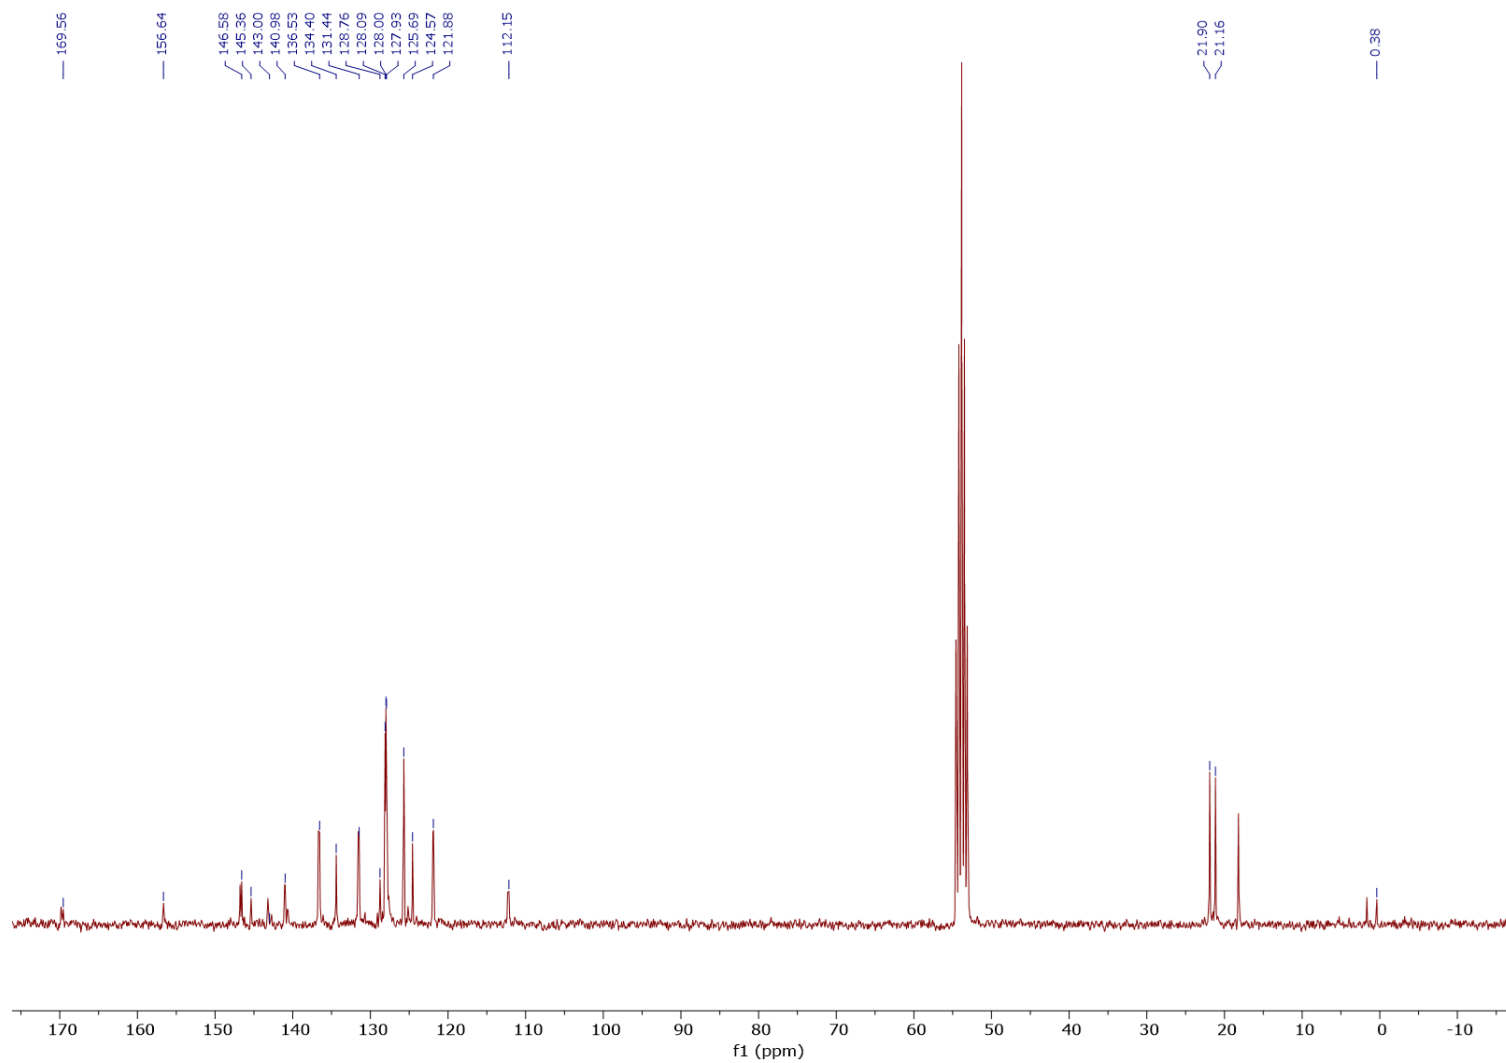

**Figure S12.**  $^{13}\text{C}\{^1\text{H}\}$  NMR spectrum of complex of  $1\cdot\text{CO}$  in  $\text{CD}_2\text{Cl}_2$ .

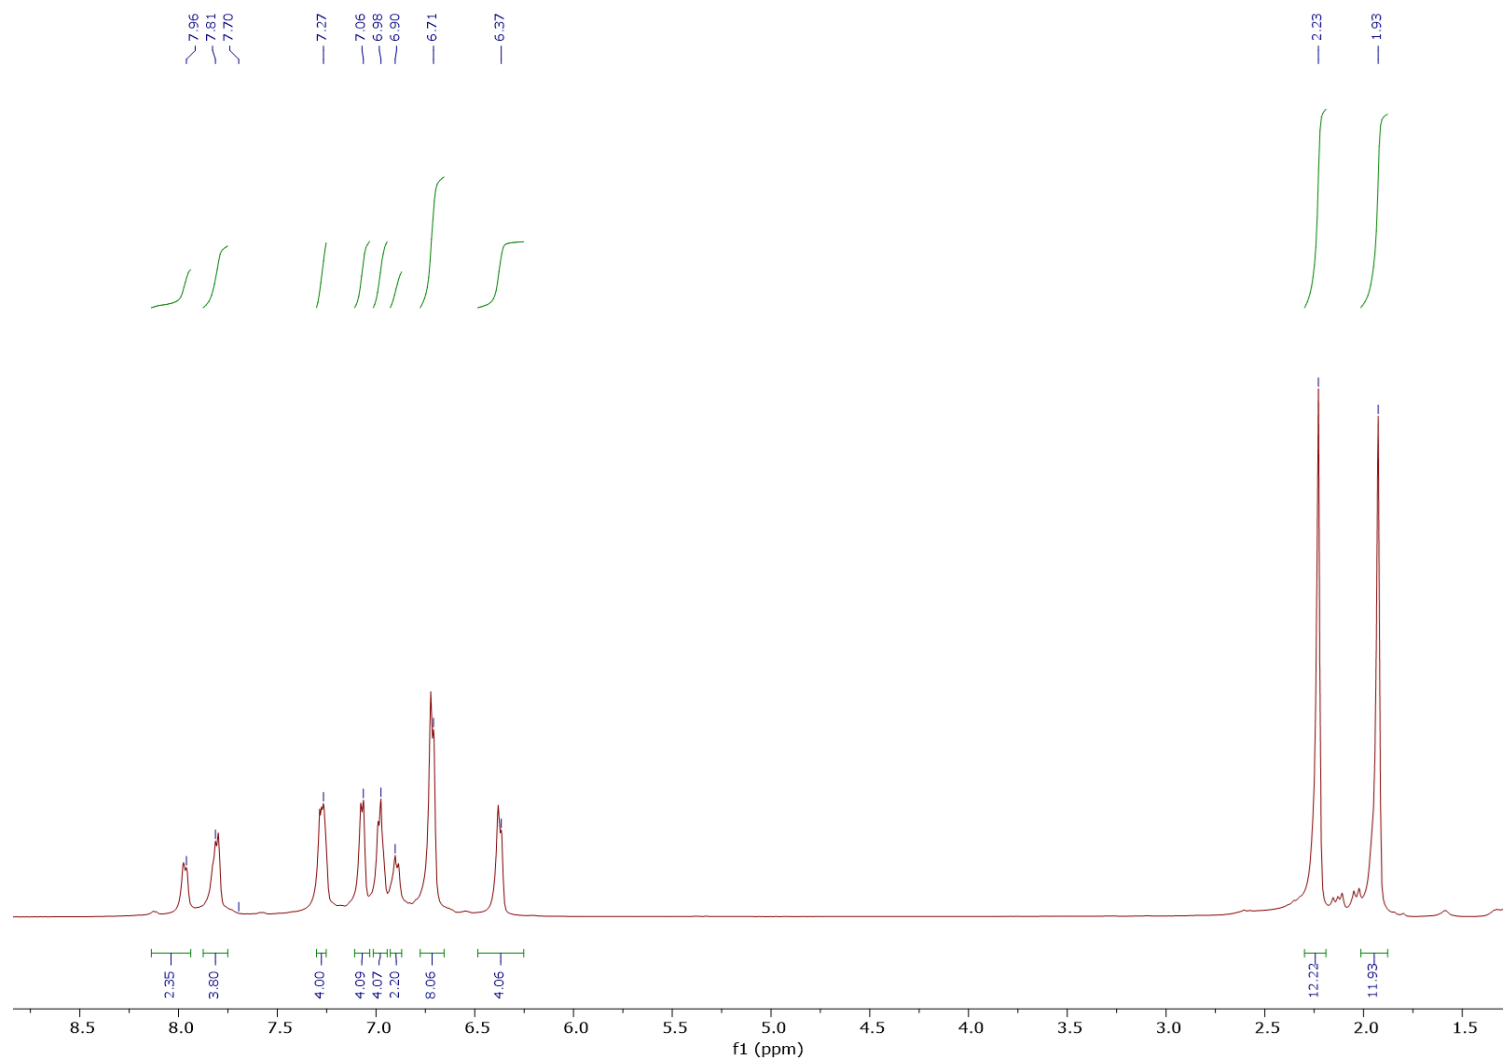

**Figure S13.** <sup>1</sup>H NMR spectrum of complex of **2** in CDCl<sub>3</sub>.

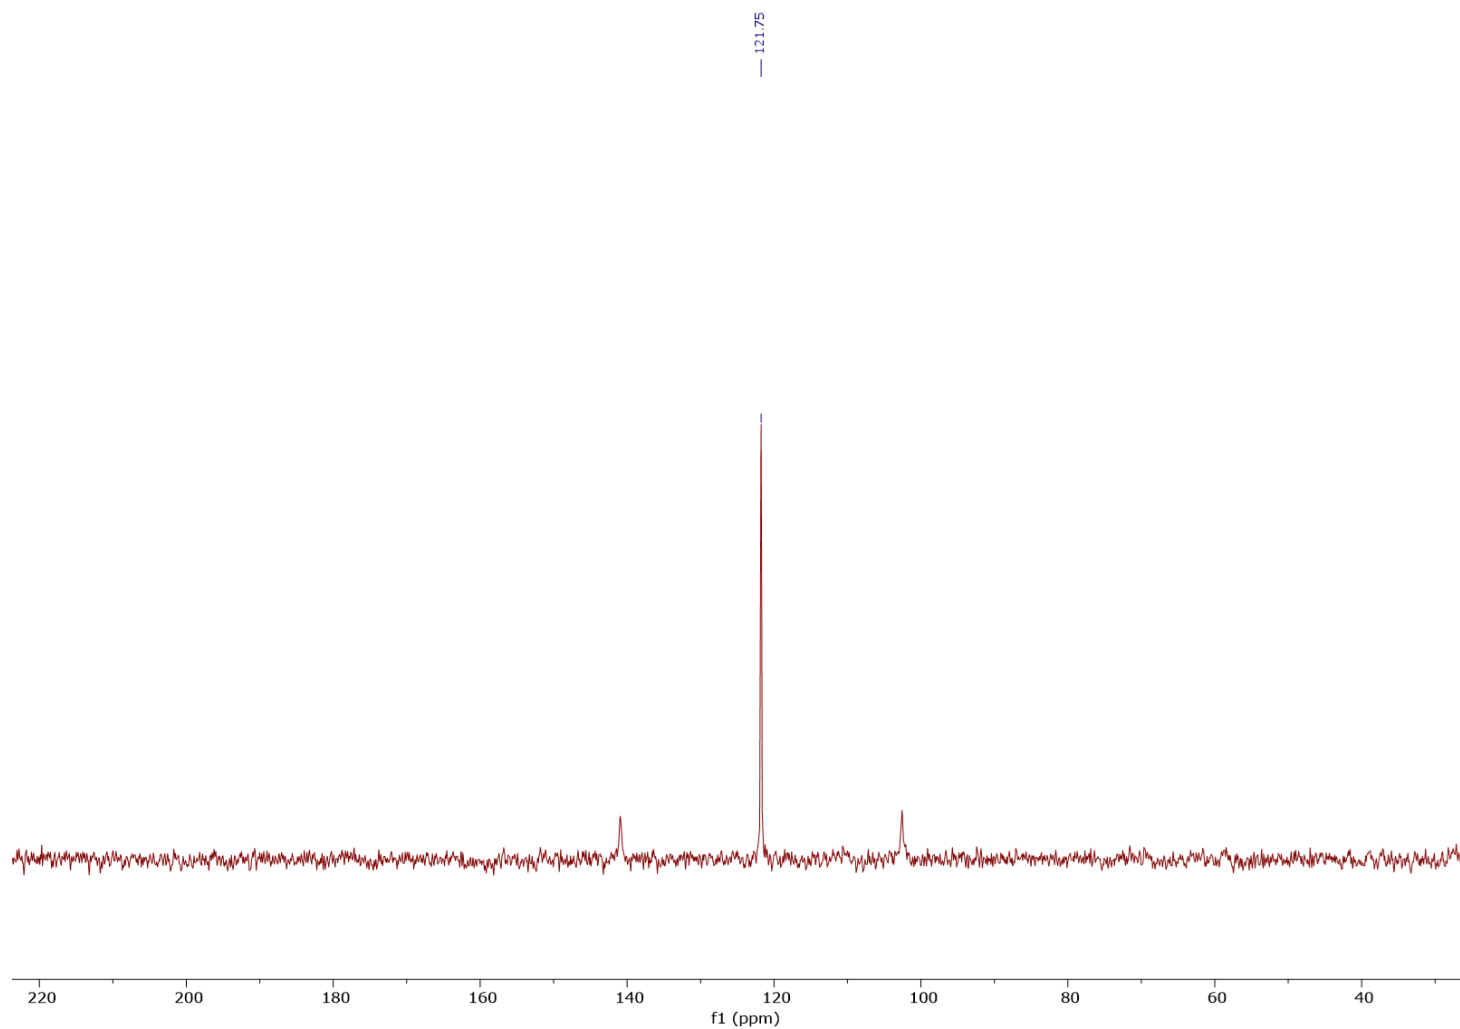

**Figura S14.**  $^{31}\text{P}\{^1\text{H}\}$  NMR spectrum of complex of **2** in  $\text{CDCl}_3$ .

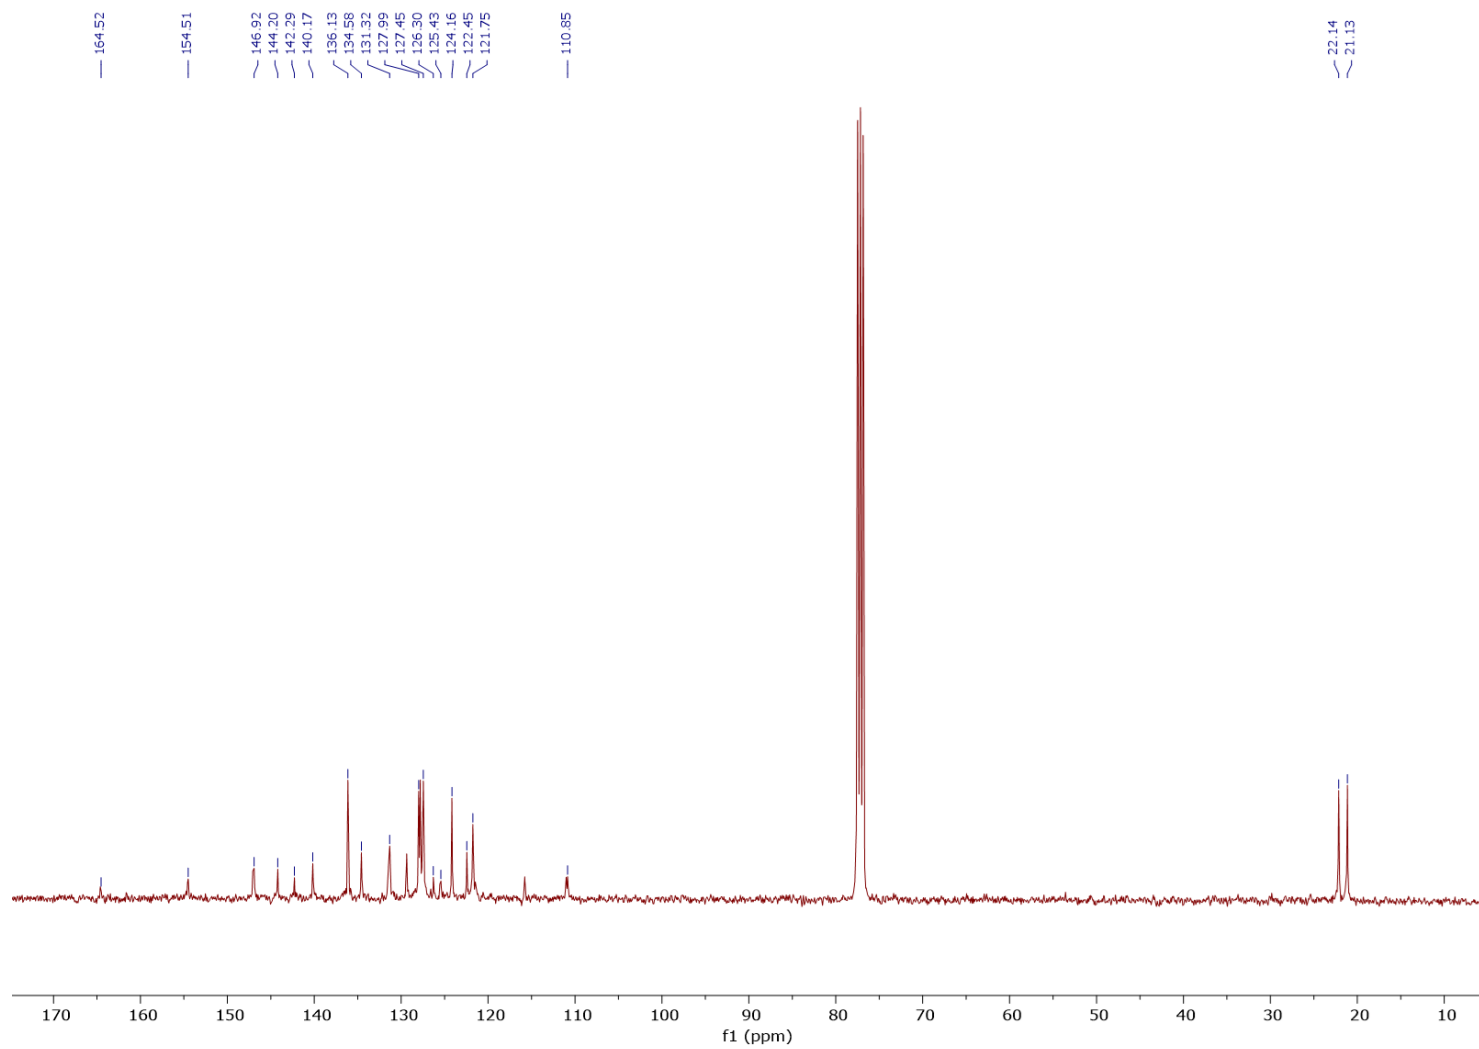

**Figure S15.**  $^{13}\text{C}\{^1\text{H}\}$  NMR spectrum of complex of **2** in  $\text{CDCl}_3$ .

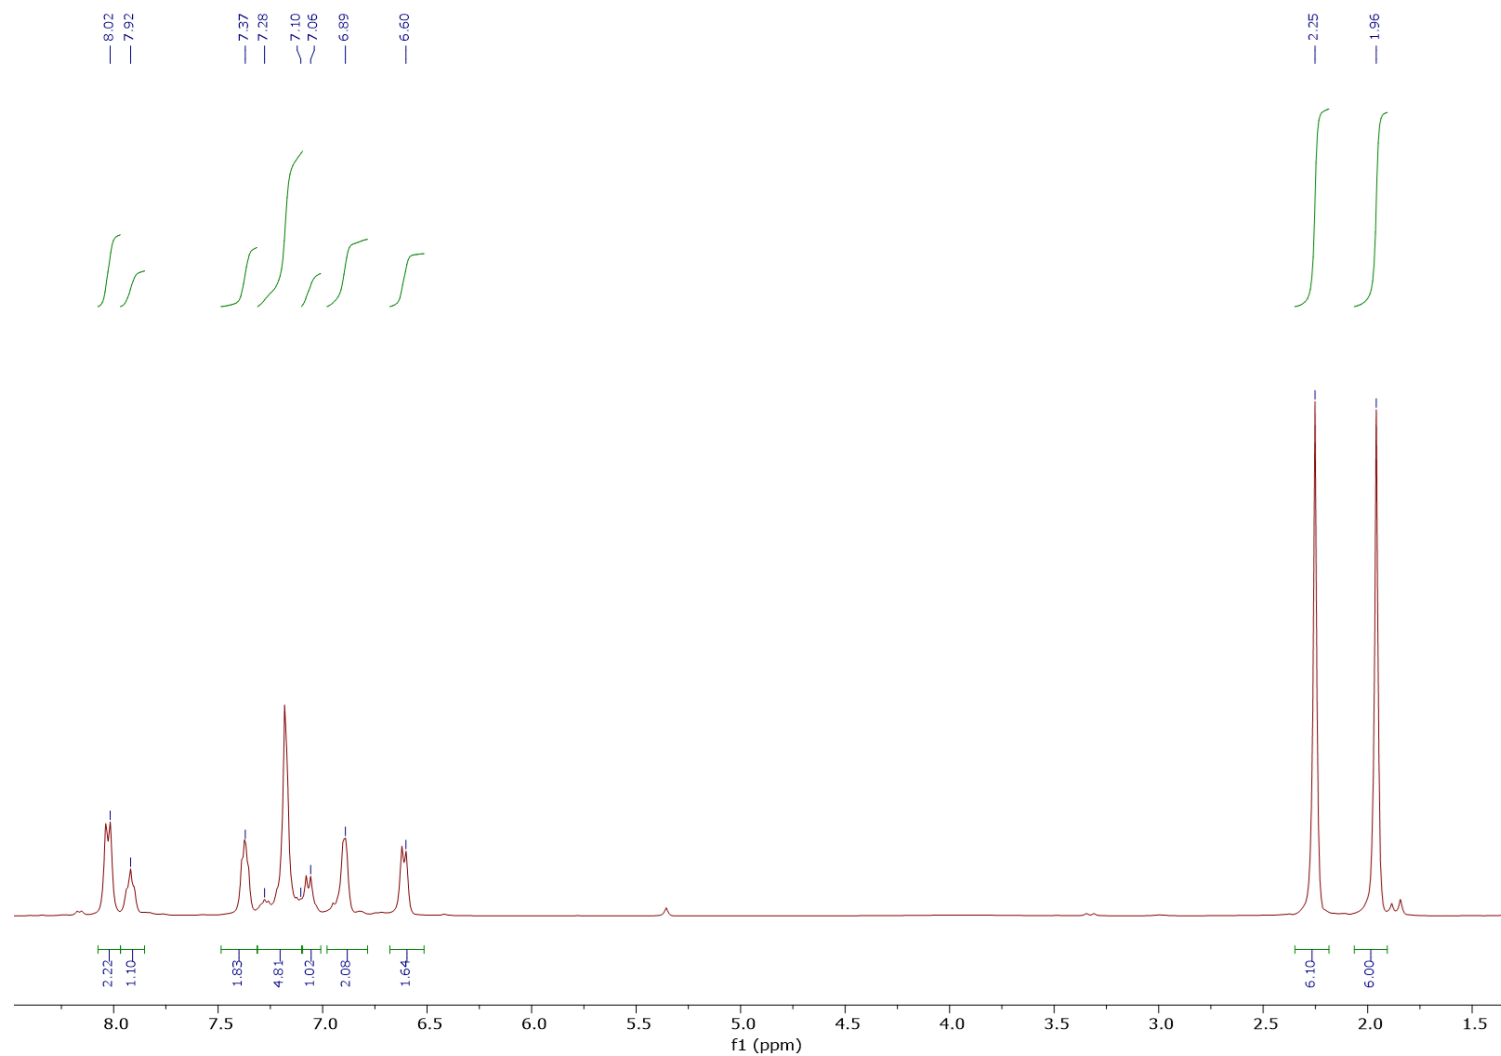

**Figure S16.** <sup>1</sup>H NMR spectrum of complex of **2**·CO in CD<sub>2</sub>Cl<sub>2</sub>.

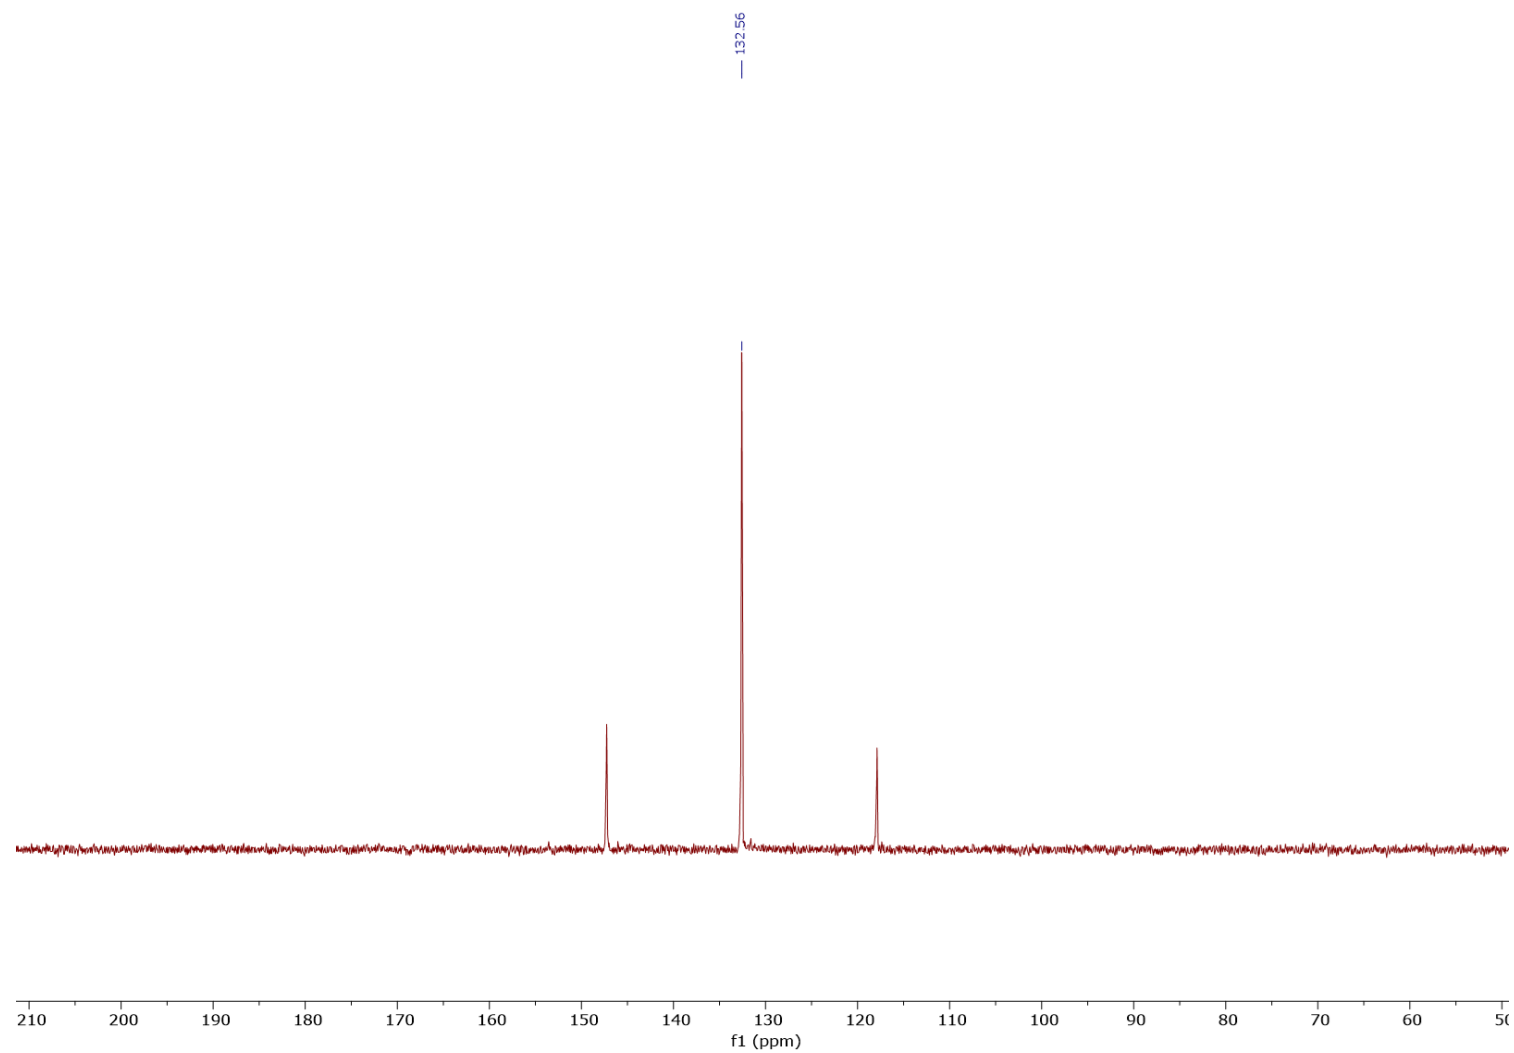

**Figura S17.**  $^{31}\text{P}\{^1\text{H}\}$  NMR spectrum of complex of **2•CO** in  $\text{CD}_2\text{Cl}_2$ .

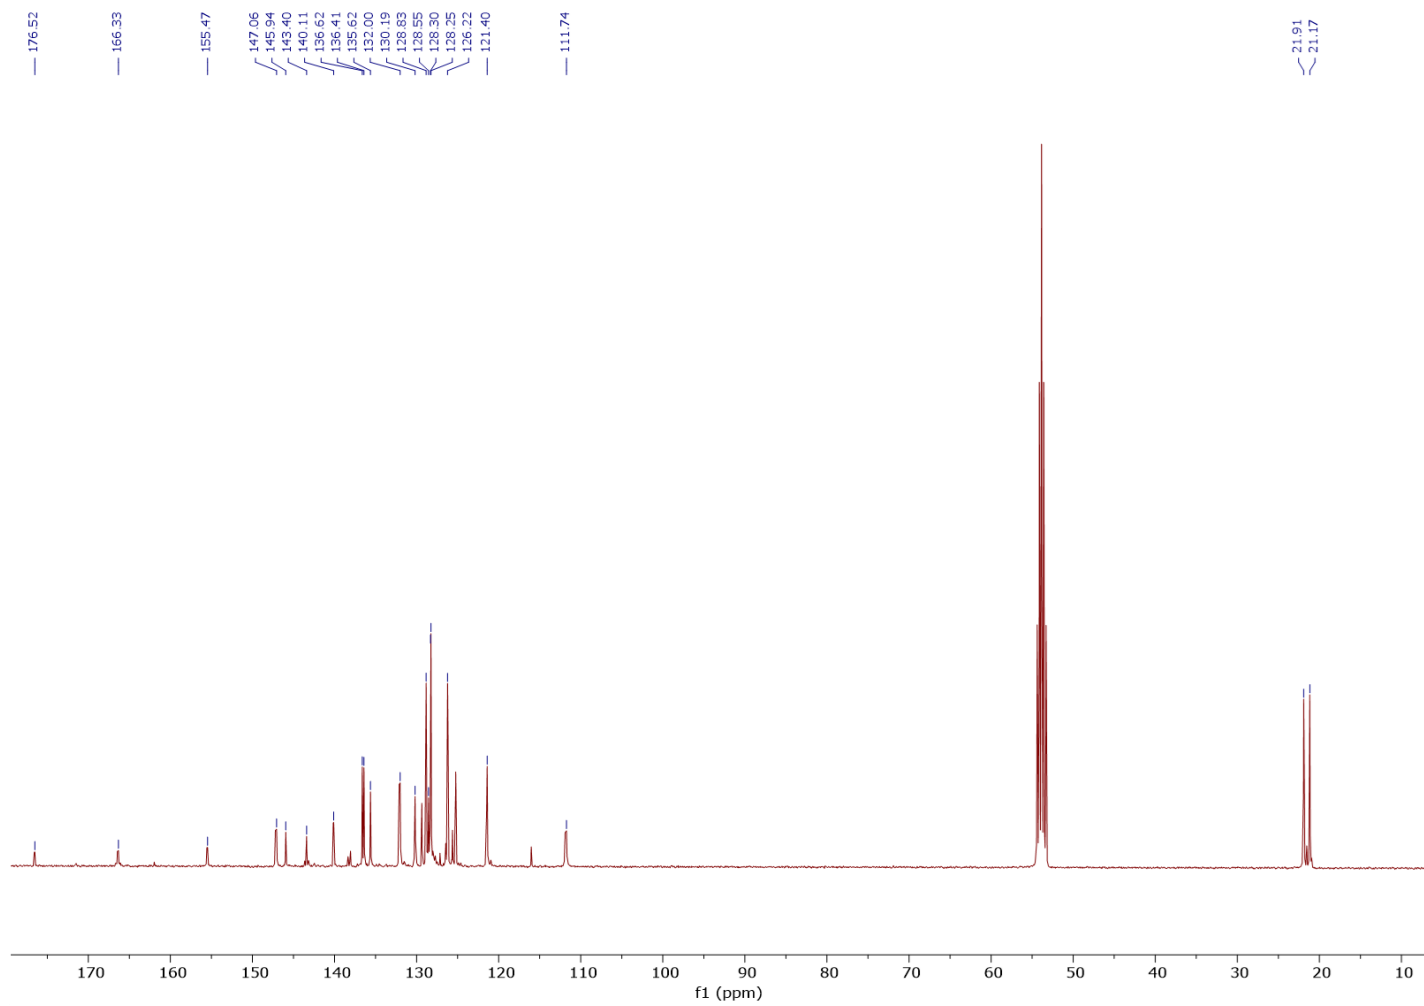

**Figure S18.**  $^{13}\text{C}\{^1\text{H}\}$  NMR spectrum of complex of **2**·CO in  $\text{CD}_2\text{Cl}_2$ .

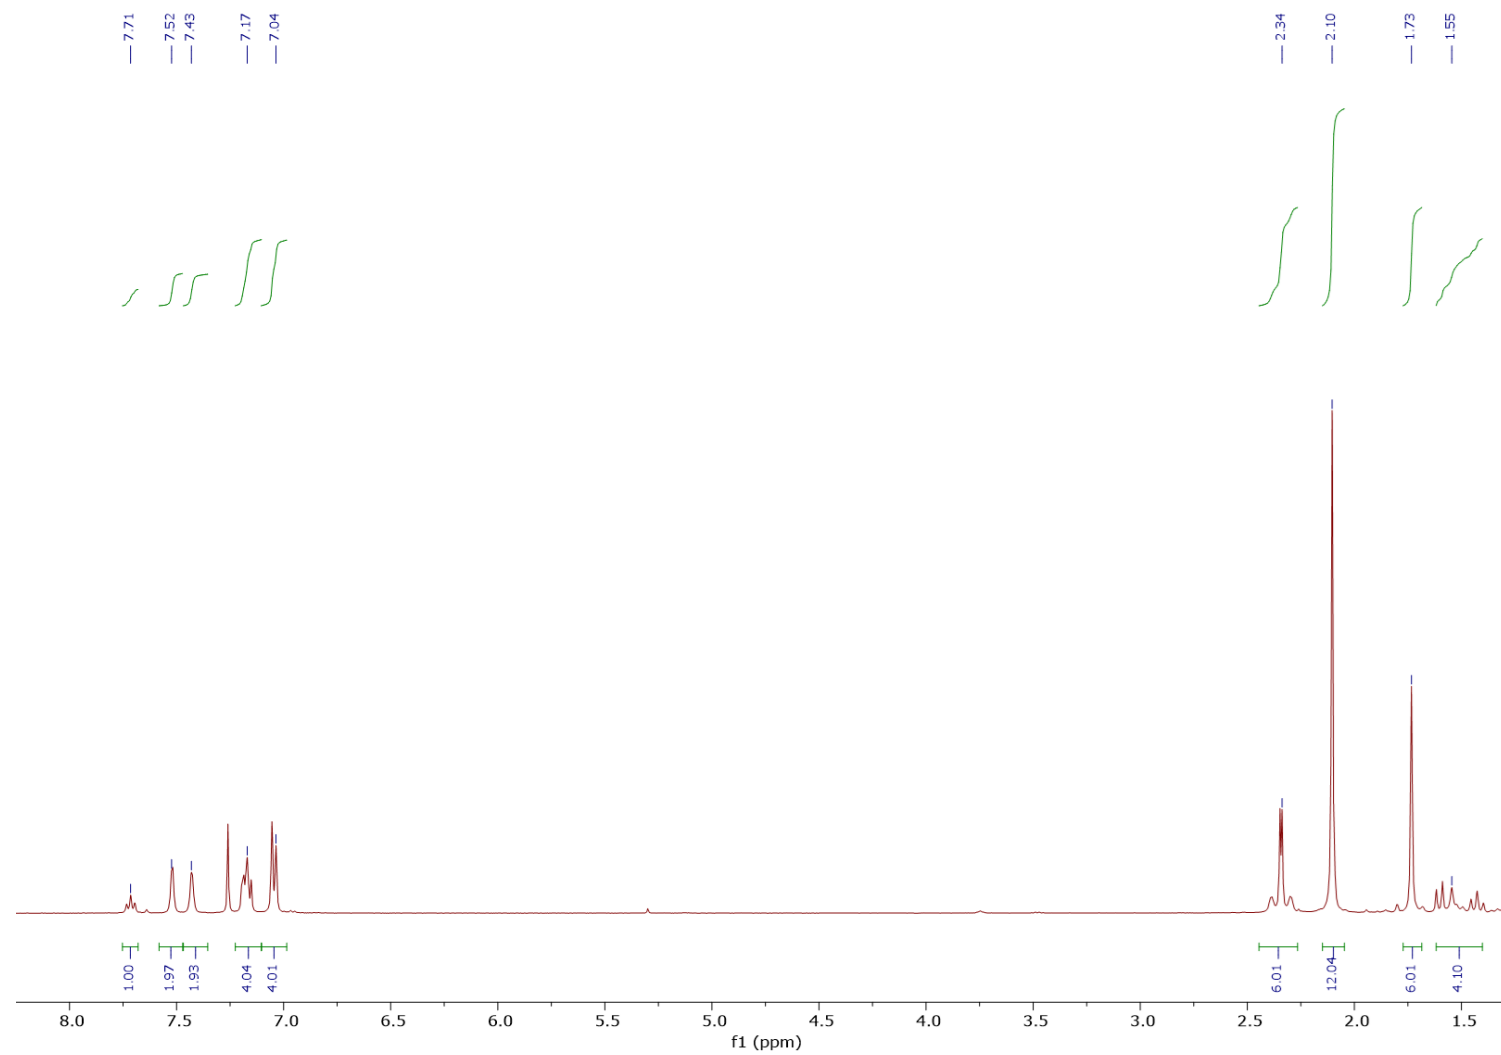

**Figure S19.** <sup>1</sup>H NMR spectrum of complex of **3**·SMe<sub>2</sub> in CDCl<sub>3</sub>.



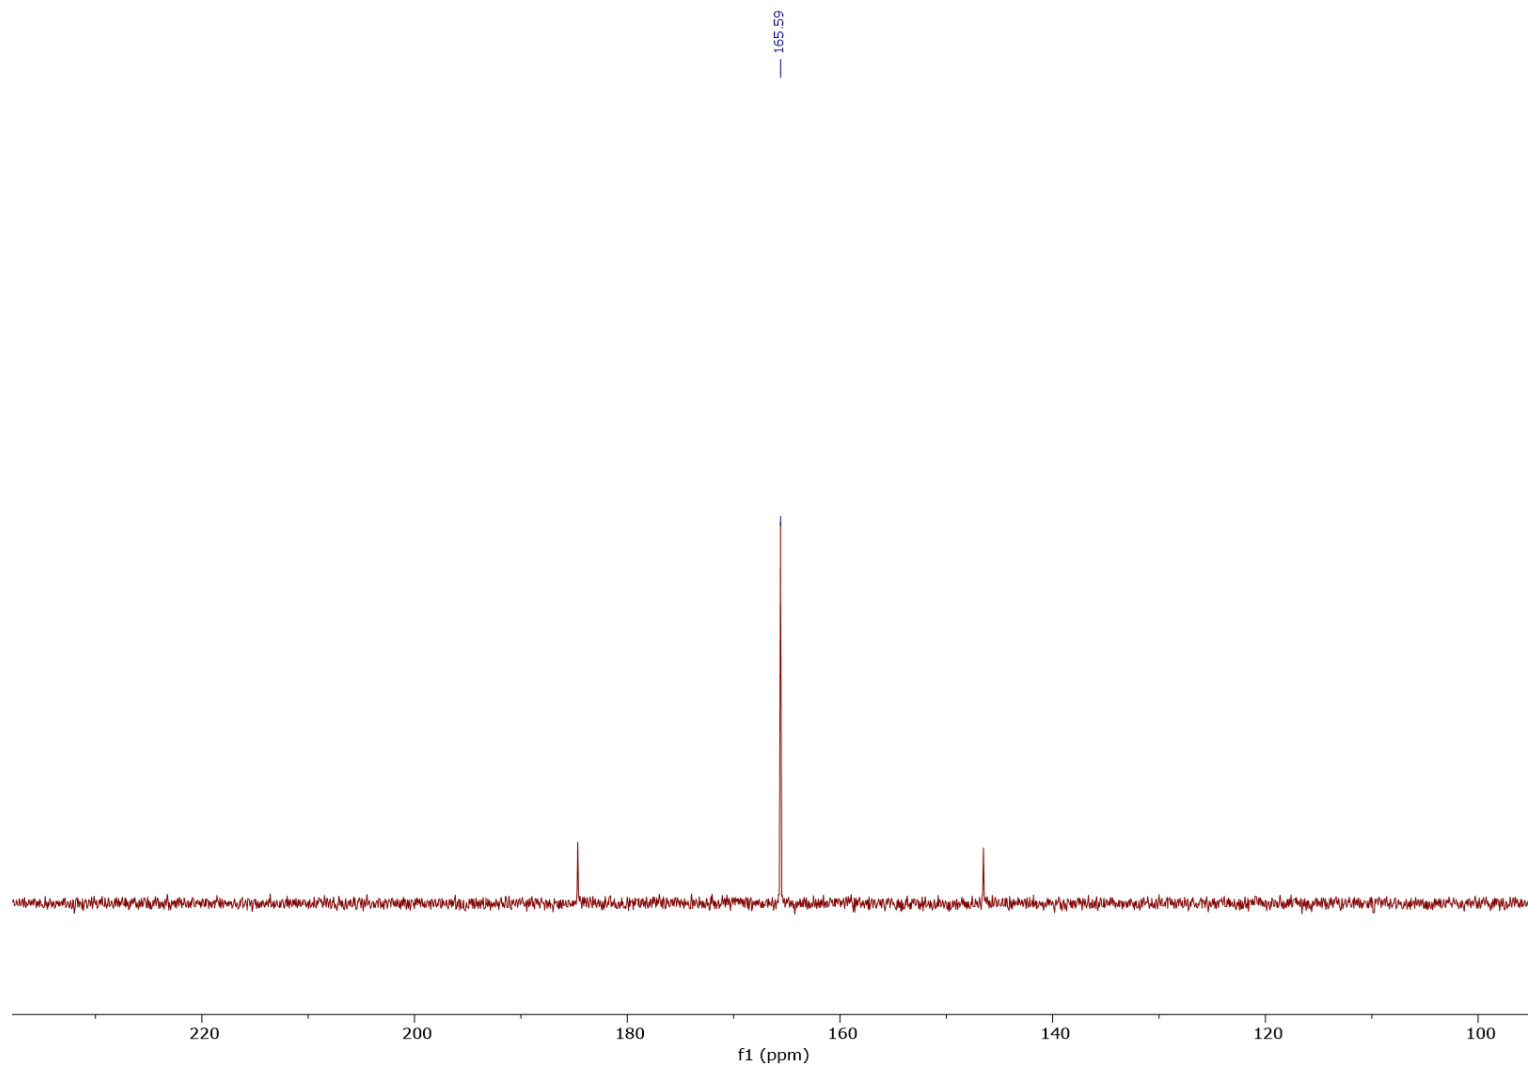

**Figura S20.**  $^{31}\text{P}\{^1\text{H}\}$  NMR spectrum of complex of  $3\cdot\text{SMe}_2$  in  $\text{CDCl}_3$ .

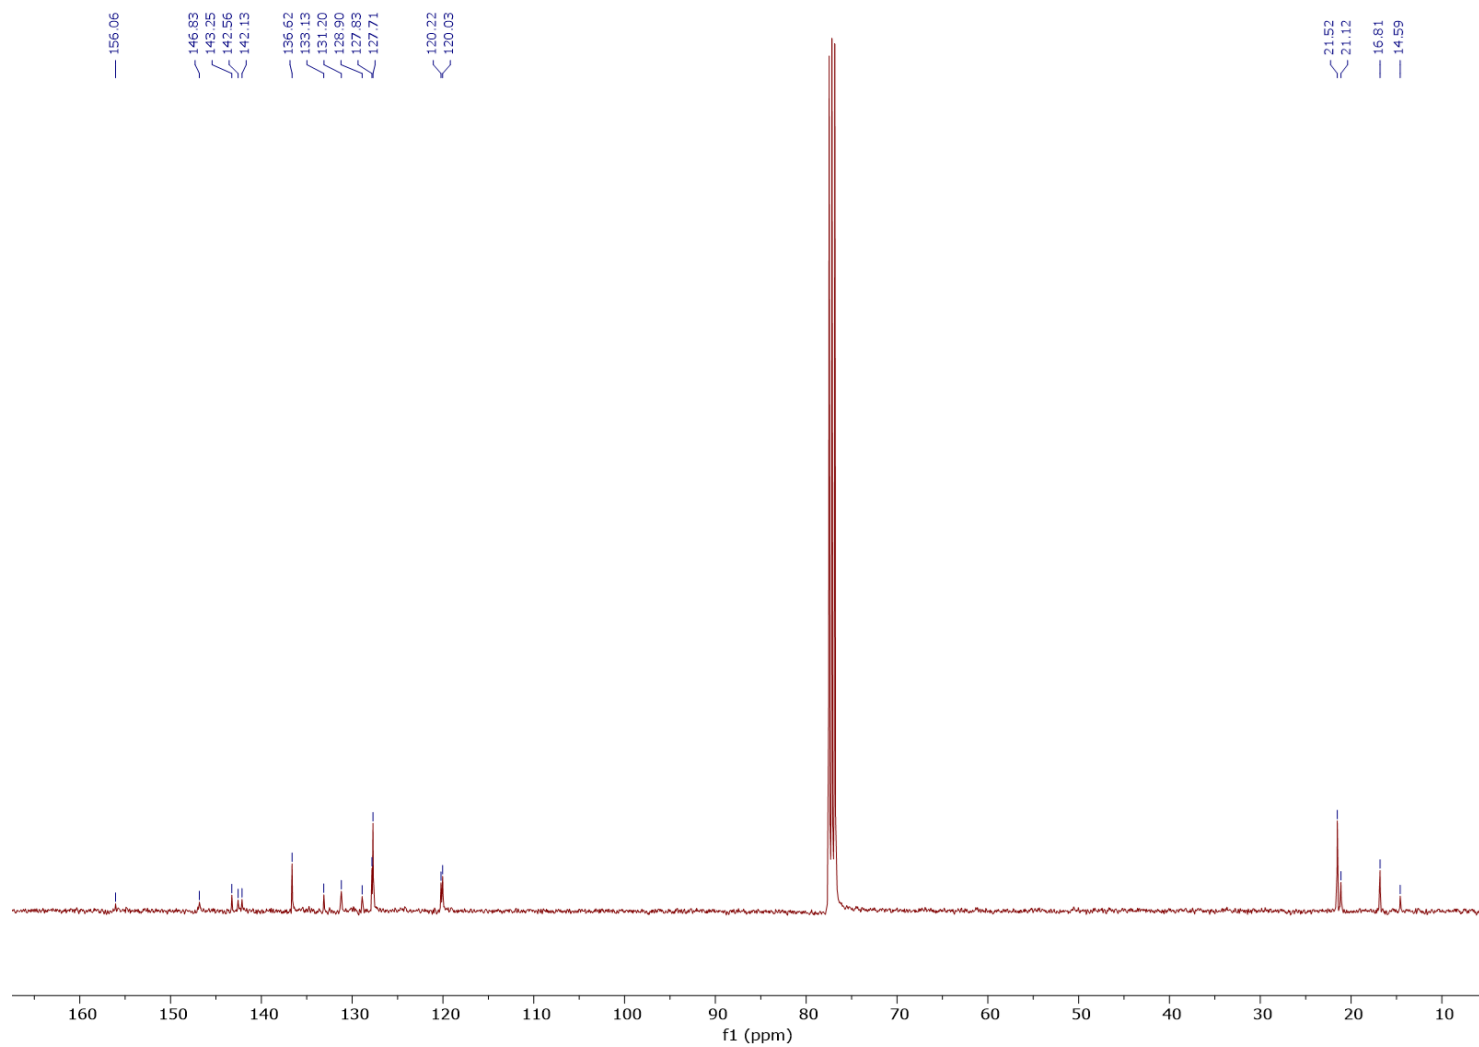

**Figure S21.**  $^{13}\text{C}\{^1\text{H}\}$  NMR spectrum of complex of **3**·SMe<sub>2</sub> in CDCl<sub>3</sub>.

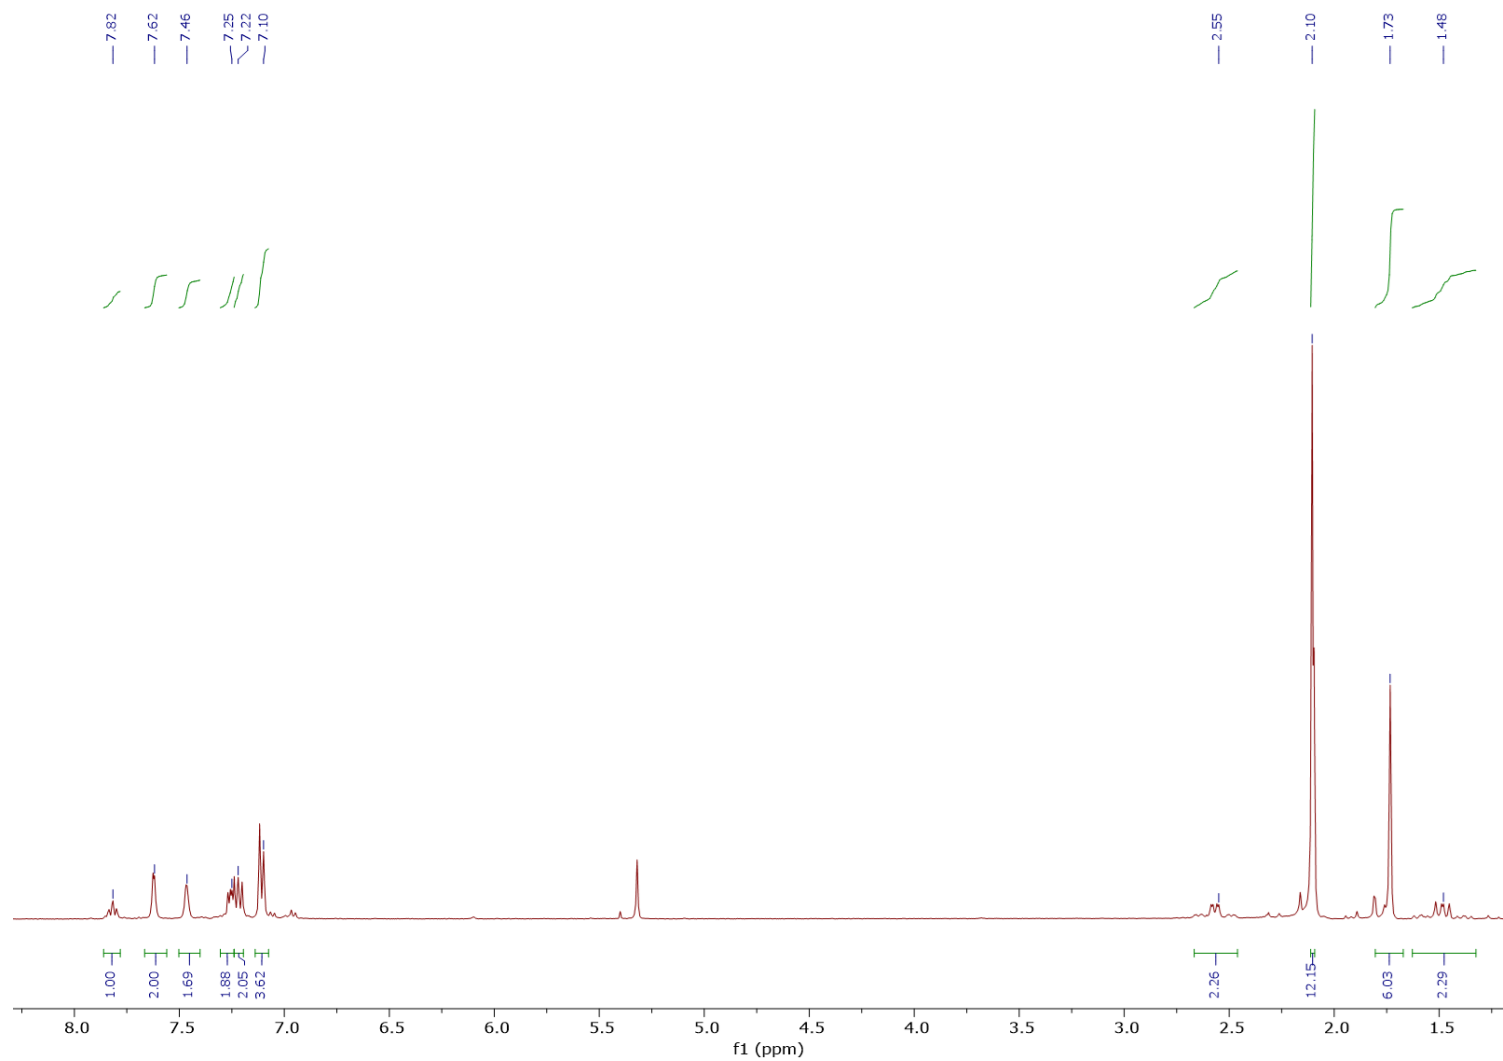

**Figure S22.** <sup>1</sup>H NMR spectrum of complex of 3·CO in CD<sub>2</sub>Cl<sub>2</sub>.

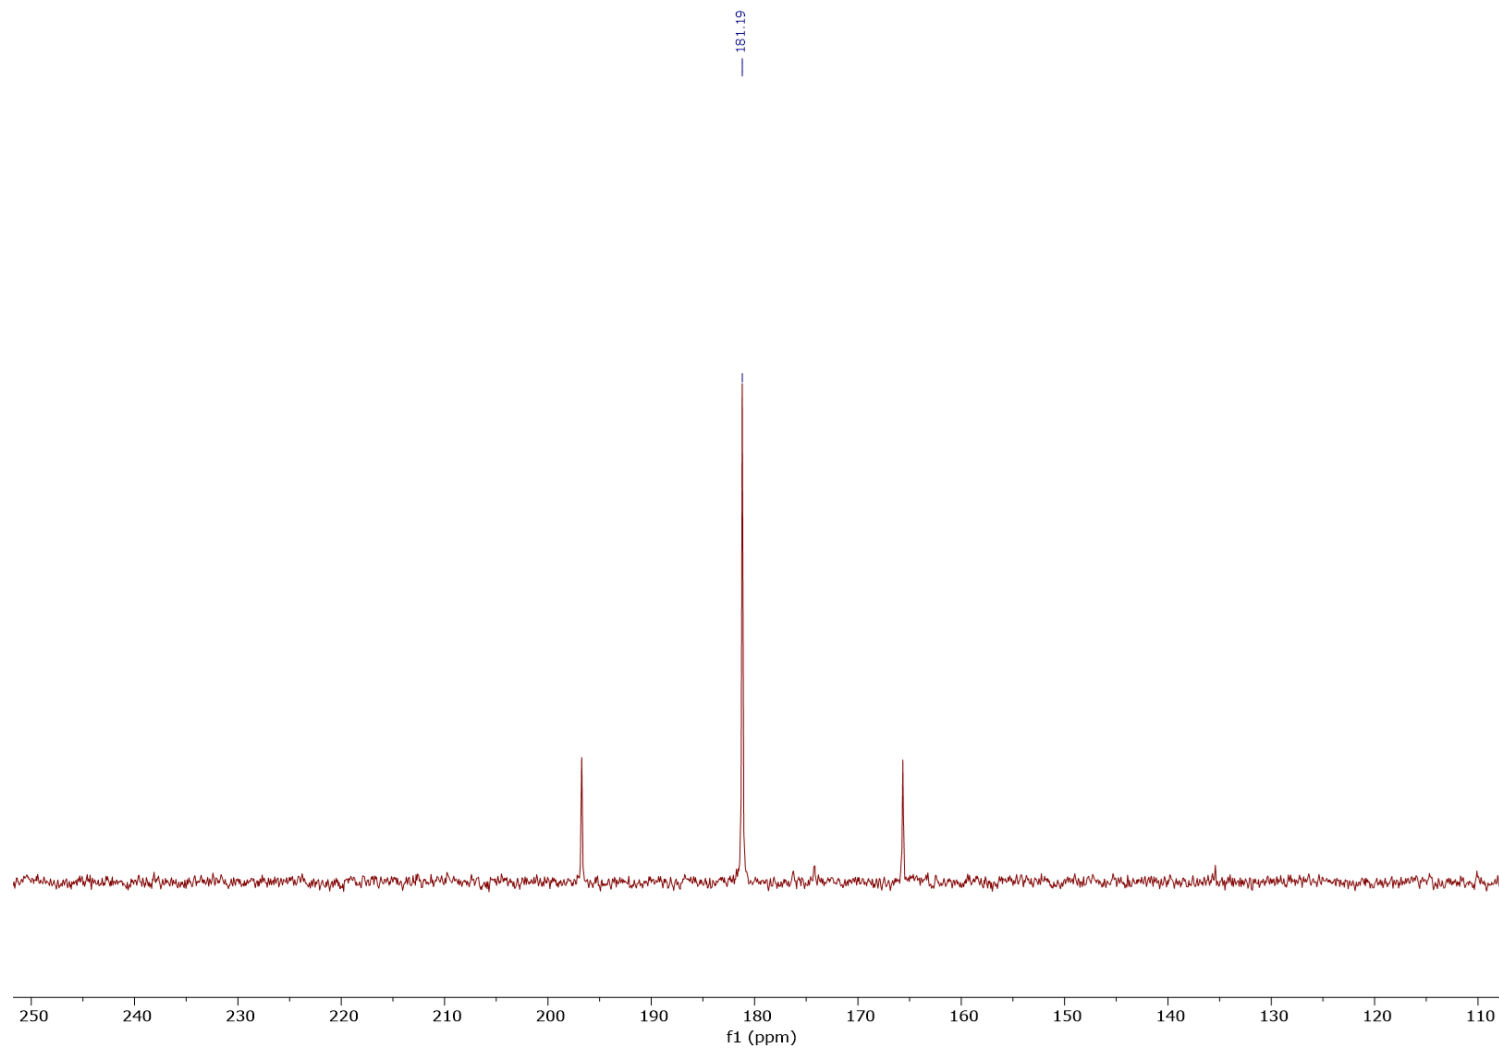

**Figure S23.**  $^{31}\text{P}\{^1\text{H}\}$  NMR spectrum of complex of **3**•CO in  $\text{CD}_2\text{Cl}_2$ .

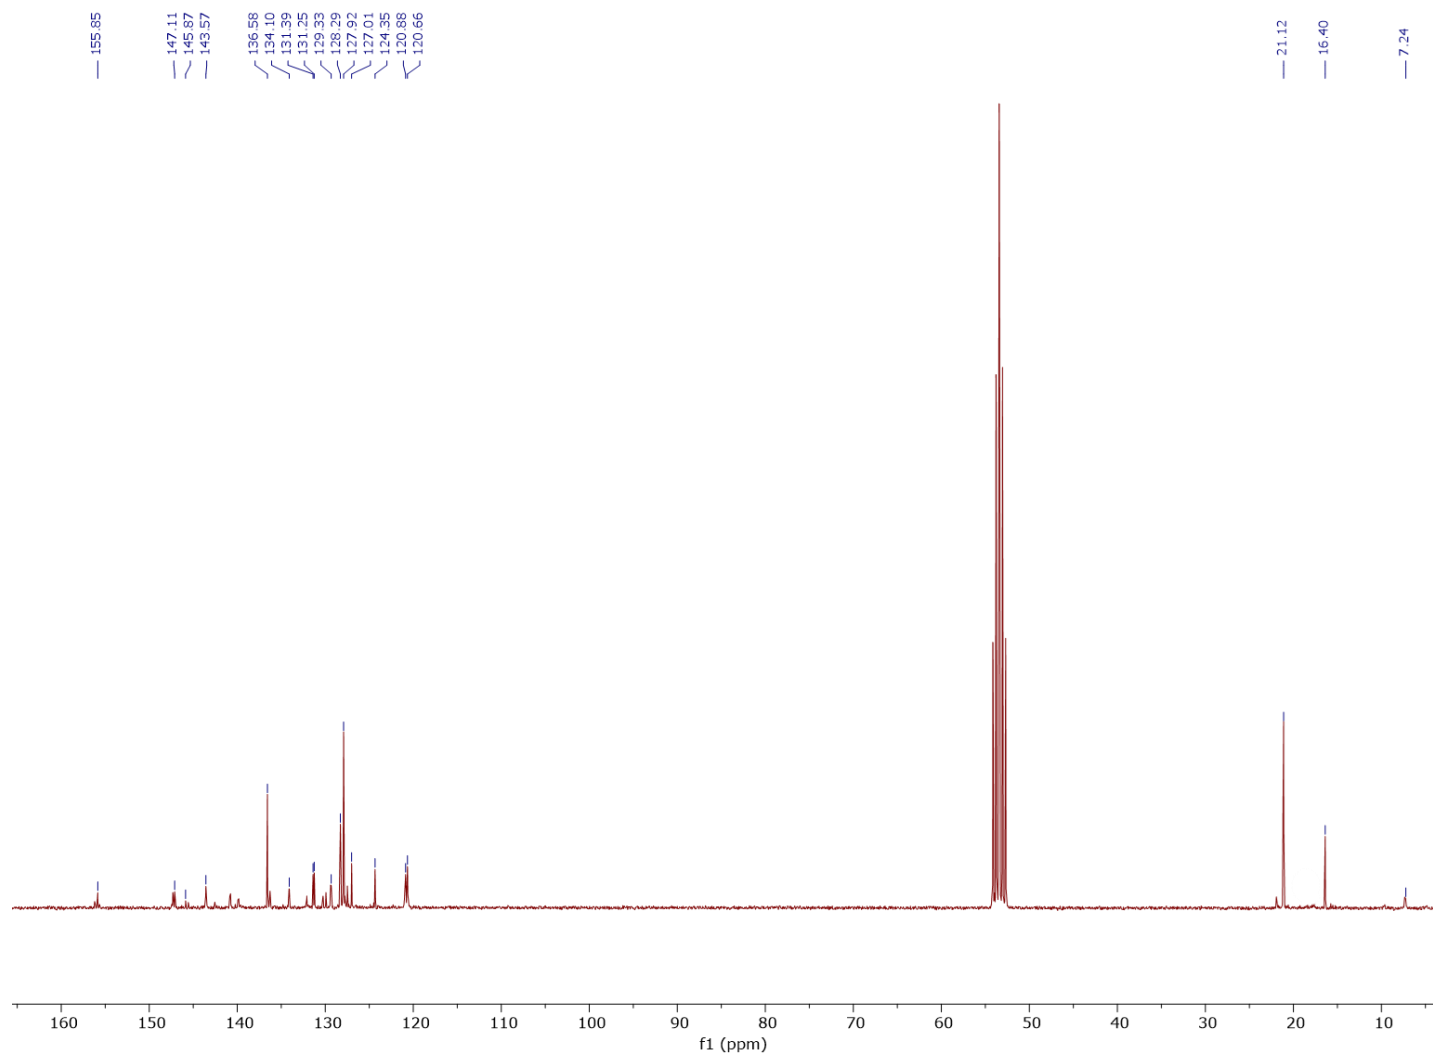

**Figure S24.**  $^{13}\text{C}\{^1\text{H}\}$  NMR spectrum of complex of  $3\cdot\text{CO}$  in  $\text{CD}_2\text{Cl}_2$ .

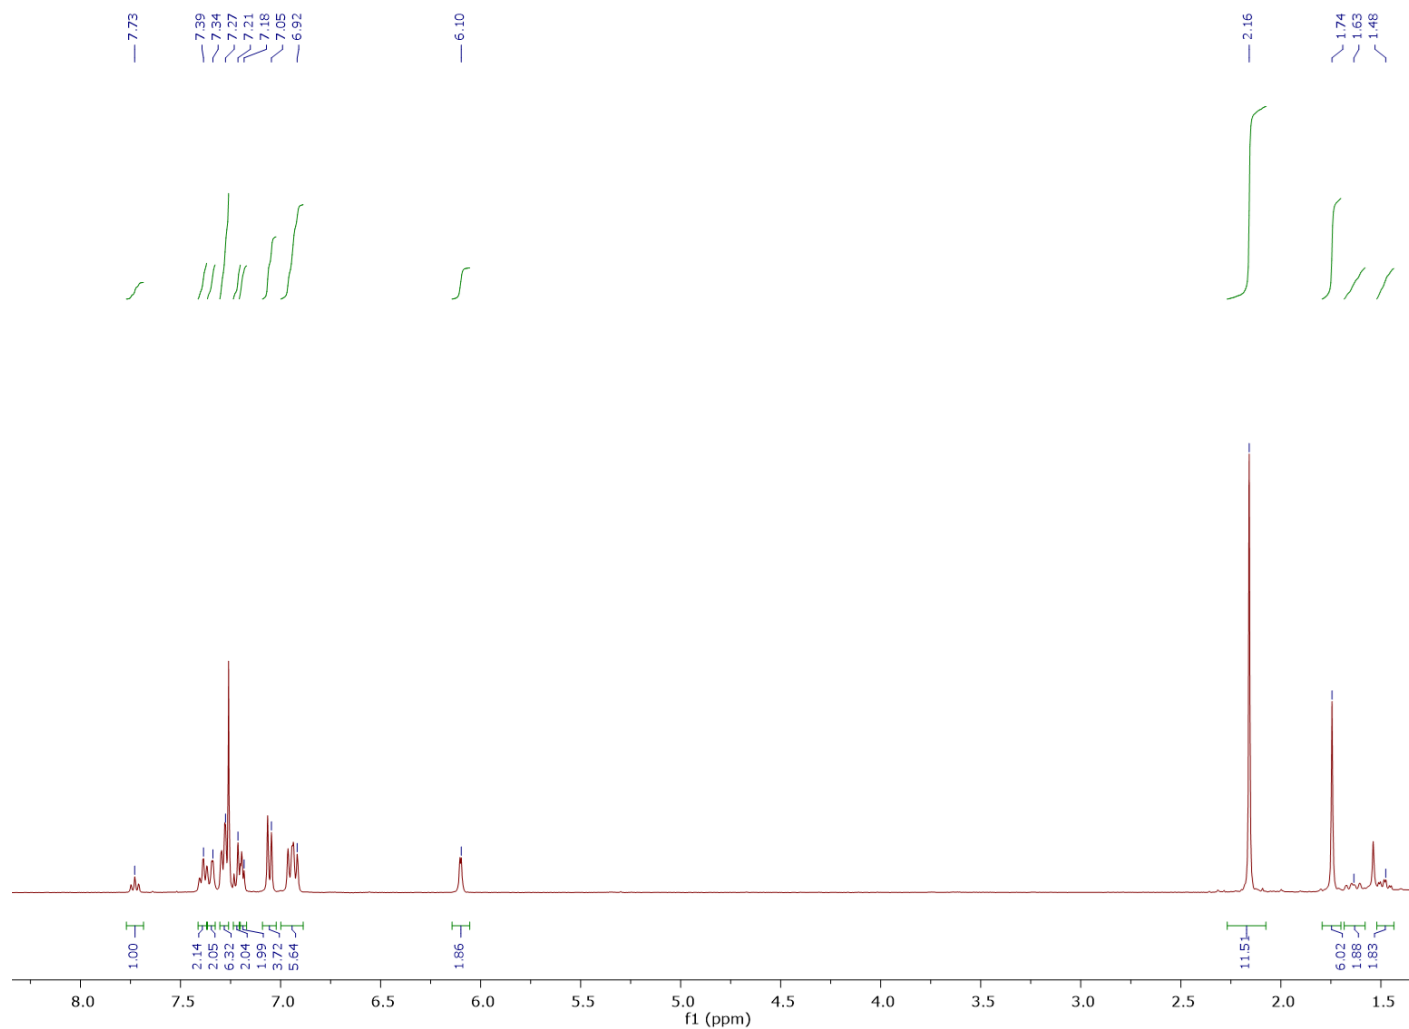

**Figure S25.** <sup>1</sup>H NMR spectrum of complex of **3**·PPh<sub>3</sub> in CDCl<sub>3</sub>.

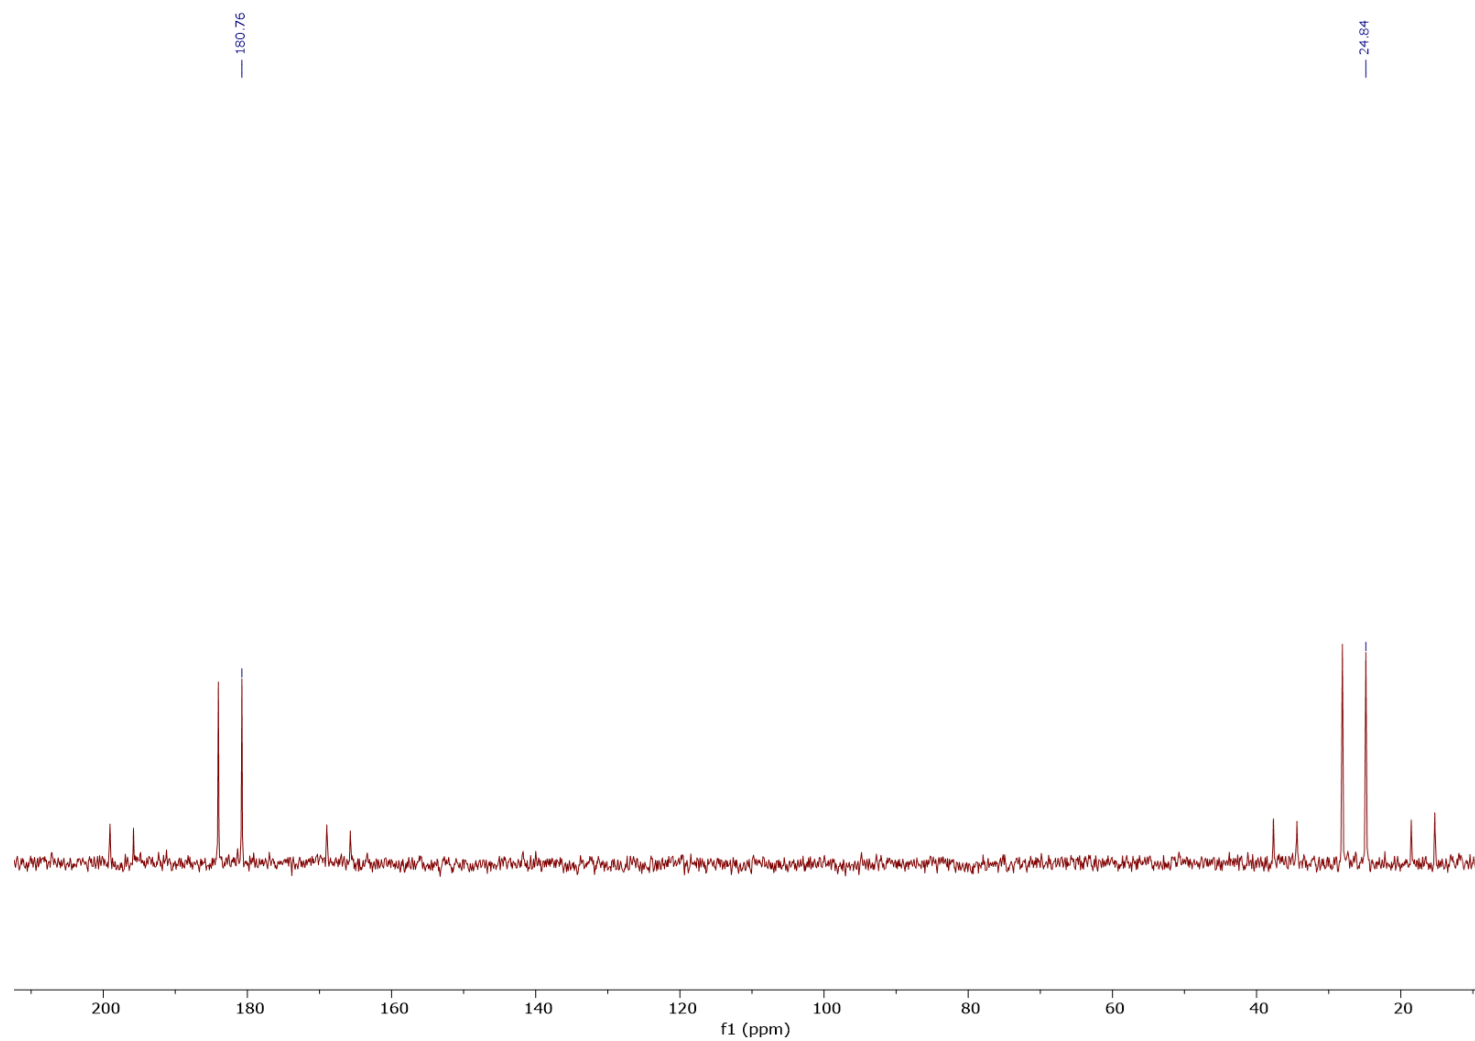

**Figura S26.**  $^{31}\text{P}\{^1\text{H}\}$  NMR spectrum of complex of **3·PPh<sub>3</sub>** in  $\text{CDCl}_3$ .

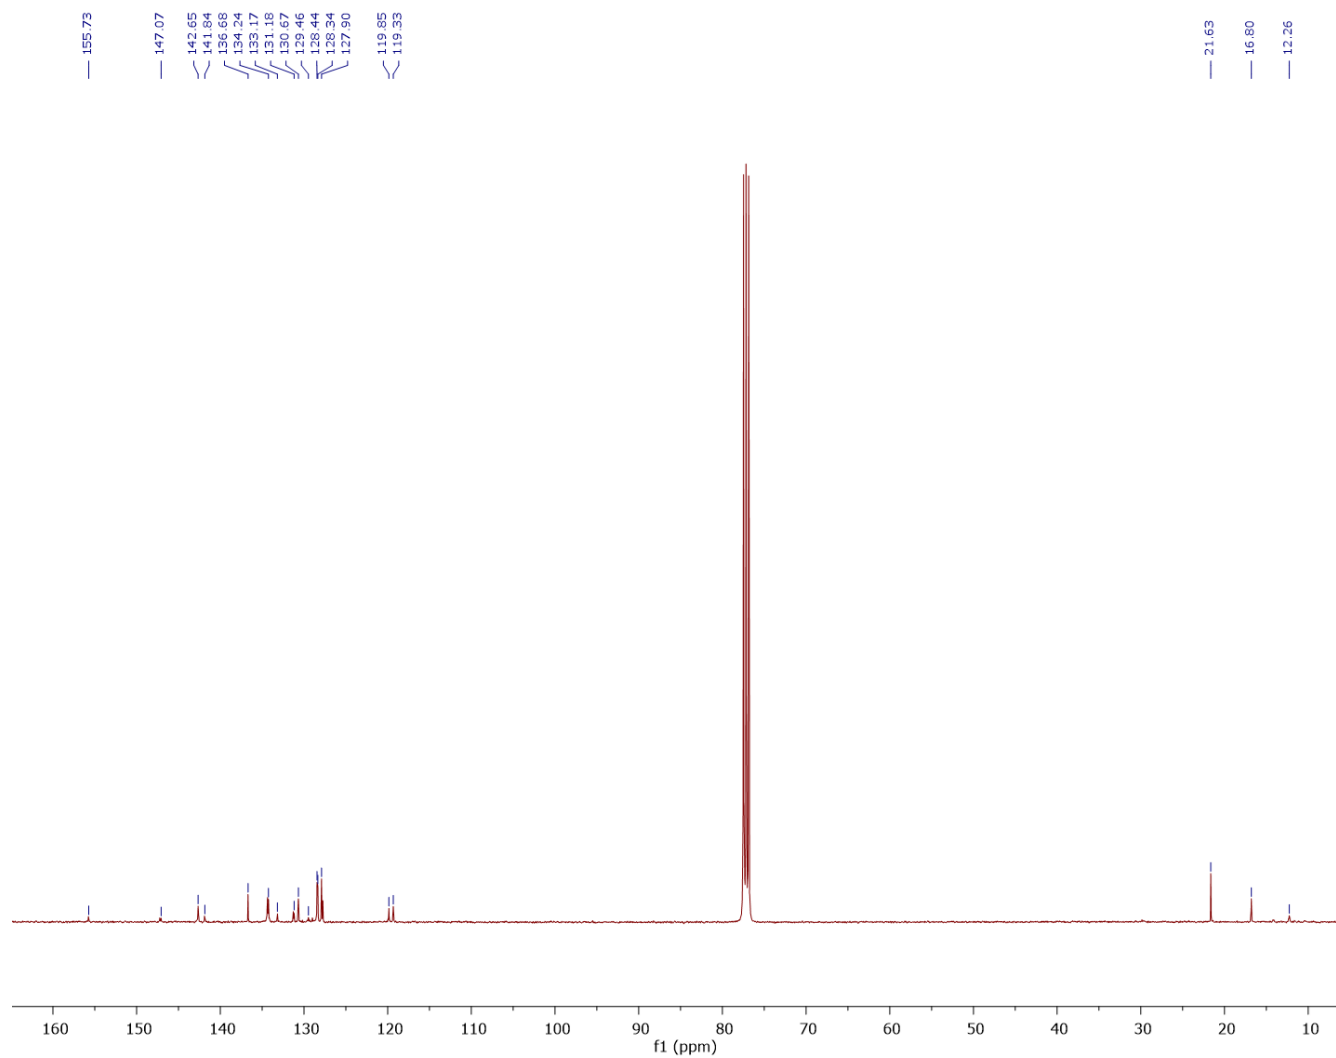

**Figura S27.**  $^{13}\text{C}\{^1\text{H}\}$  NMR spectrum of complex of **3·PPh<sub>3</sub>** in  $\text{CDCl}_3$ .
